# Supplementary material for: Lactate dehydrogenase A regulates tumor-macrophage symbiosis to promote glioblastoma progression
Source: Springer Nature journal article supplement (doi:10.1038/s41467-024-46193-z), 2024-03-05
Supplement: MOESM1 [file 41467_2024_46193_MOESM1_ESM.pdf]

Supplementary Information Fig. 1

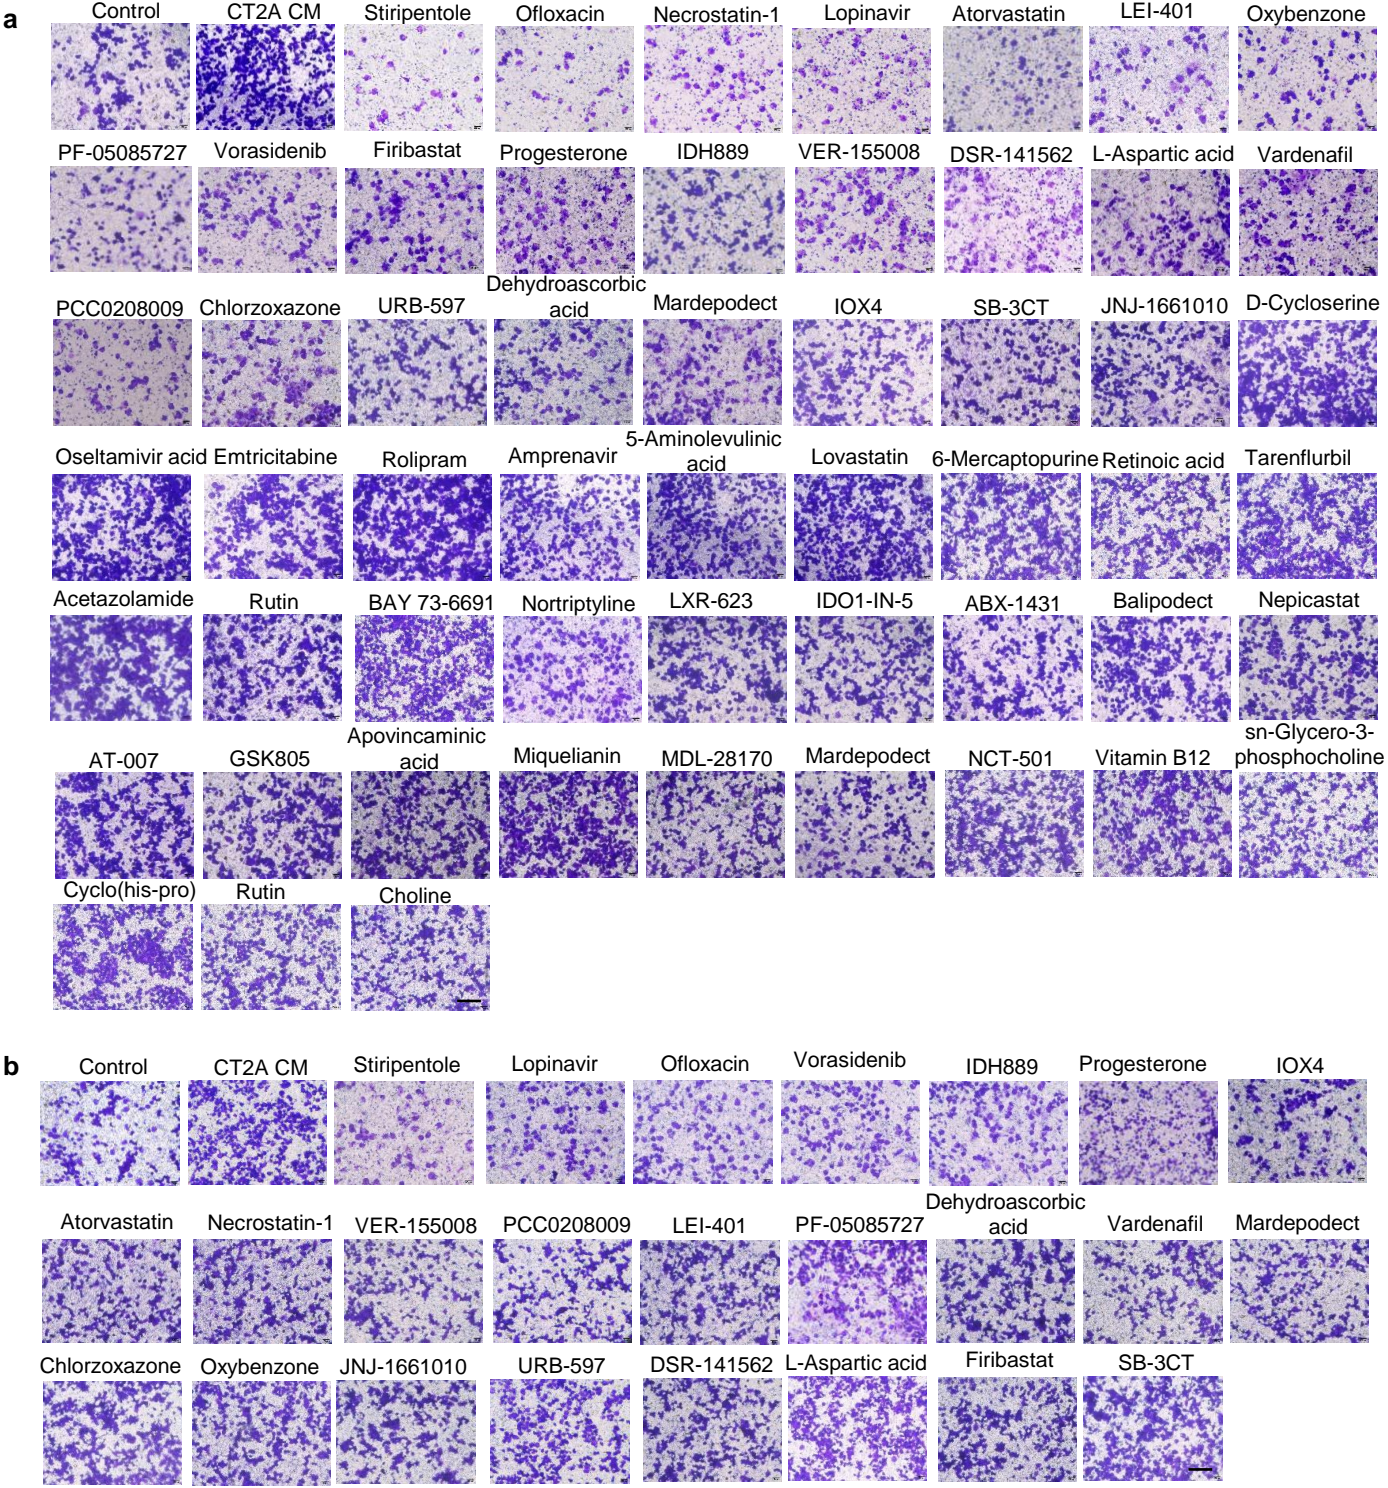

**Supplementary Fig. S1. Screening of metabolic compounds that can inhibit CT2A cell-induced macrophage migration.** (a) Representative images of the migration of Raw264.7 macrophages following stimulation with conditioned media (CM) from CT2A cells treated with or without a cluster of 55 brain-penetrant small-molecule compounds with metabolic reprogramming functions at 10  $\mu$ M. Scale bar, 100  $\mu$ m. (b) Representative images of the migration of Raw264.7 macrophages following stimulation with conditioned media (CM) from CT2A cells treated with or without a cluster of 24 brain-penetrant small-molecule compounds with metabolic reprogramming functions at 5  $\mu$ M. Scale bar, 100  $\mu$ m. A representative example of three replicates is shown for (a and b).

## Supplementary Information Fig. 2

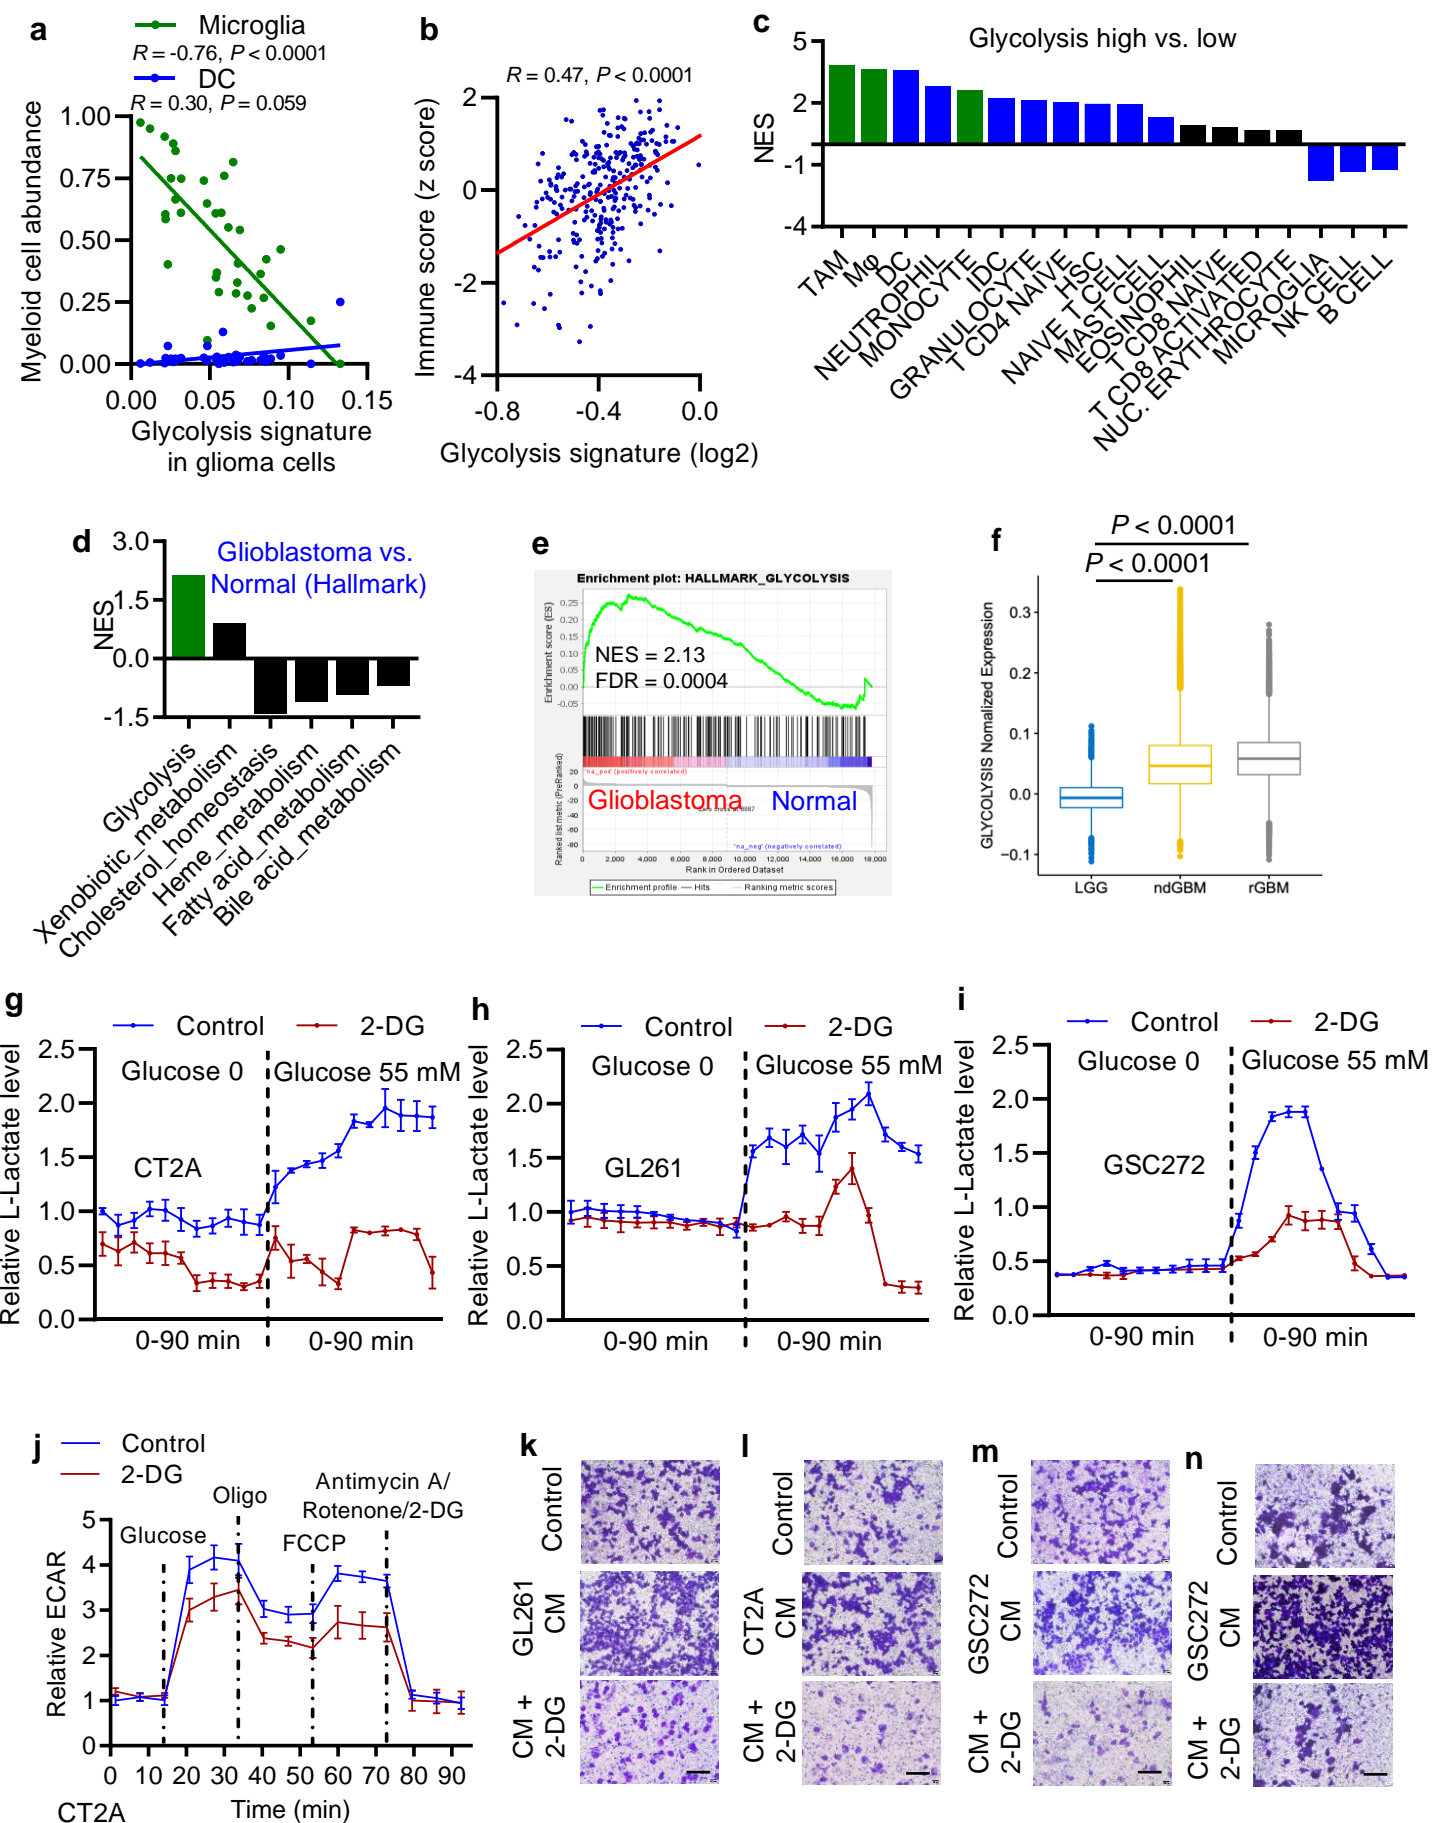

**Supplementary Fig. S2. The role of glioblastoma cell glycolysis in regulating immune response and macrophage infiltration.** **(a)** The correlation analysis between glycolysis signature in glioblastoma cells and the abundance of microglia, and dendritic cells (DCs) in glioblastoma patient tumors based on single-cell RNA sequencing data <sup>34</sup>. *R* and *P* values are shown. **(b)** The correlation analysis between glycolysis signature and immune score in TCGA glioblastoma dataset (*n* = 300). The immune score was determined based on expression data from TCGA glioblastoma dataset <sup>31</sup>. *R* and *P* values are shown. **(c)** GSEA analysis for distinct types of immune cells in glycolysis signature-high (*n* = 119) and -low (*n* = 119) patients in TCGA glioblastoma dataset. Green bars indicate macrophage-related signatures, green and blue bars indicate the signatures that are enriched in glycolysis signature-high tumors (FDR<0.25). **(d)** GSEA analysis for distinct types of metabolic signatures in glioblastoma patient tumors (*n* = 478) versus normal brains (*n* = 10) from the TCGA glioblastoma dataset. Green bar indicates the glycolysis signature that is significantly enriched in glioblastoma (FDR<0.25). **(e)** GSEA for glycolysis signature in glioblastoma patient tumors (*n* = 478) versus normal brains (*n* = 10) from the TCGA glioblastoma dataset. NES and FDR values are shown. **(f)** Expression of glycolysis signature in glioma cells of low-grade gliomas (LGG), newly diagnosed glioblastoma (ndGBM), and recurrent glioblastoma (rGBM) based on single-cell RNA sequencing data <sup>34</sup>. **(g-i)** Glycolytic activity assay on CT2A cells **(g)**, GL261 cells **(h)**, and GSC272 **(i)** treated with or without glycolysis inhibitor 2-deoxy-D-glucose (2-DG, 10 mM) in the presence or absence of glucose (55 mM). *n* = 3 independent samples. **(j)** Extracellular acidification rate (ECAR) of CT2A cells treated with or without 2-DG (10 mM). ECAR was obtained from the Seahorse experiments and glucose was added at indicated time point. *n* = 6 independent samples. **(k, l)** Representative images of the migration of Raw264.7 macrophages **(k)** and primary mouse bone marrow-derived macrophages (BMDMs, **l**) following stimulation with conditioned media (CM) from GL261 and CT2A cells, respectively, treated with or without 2-DG (10 mM). Scale bar, 100  $\mu$ m. **(m, n)** Representative images of the migration of THP-1 macrophages **(m)** and primary human BMDMs **(n)** following stimulation with CM from GSC272 treated with or without 2-DG (10 mM). Scale bar, 100  $\mu$ m. A representative example of five replicates is shown for (k–n). The experiments for (j) were independently repeated at least three times. Statistical analyses were determined by Pearson's correlation test (a, b) and one-way ANOVA test (f). Source data are provided as a Source Data file.

Supplementary Information Fig. 3

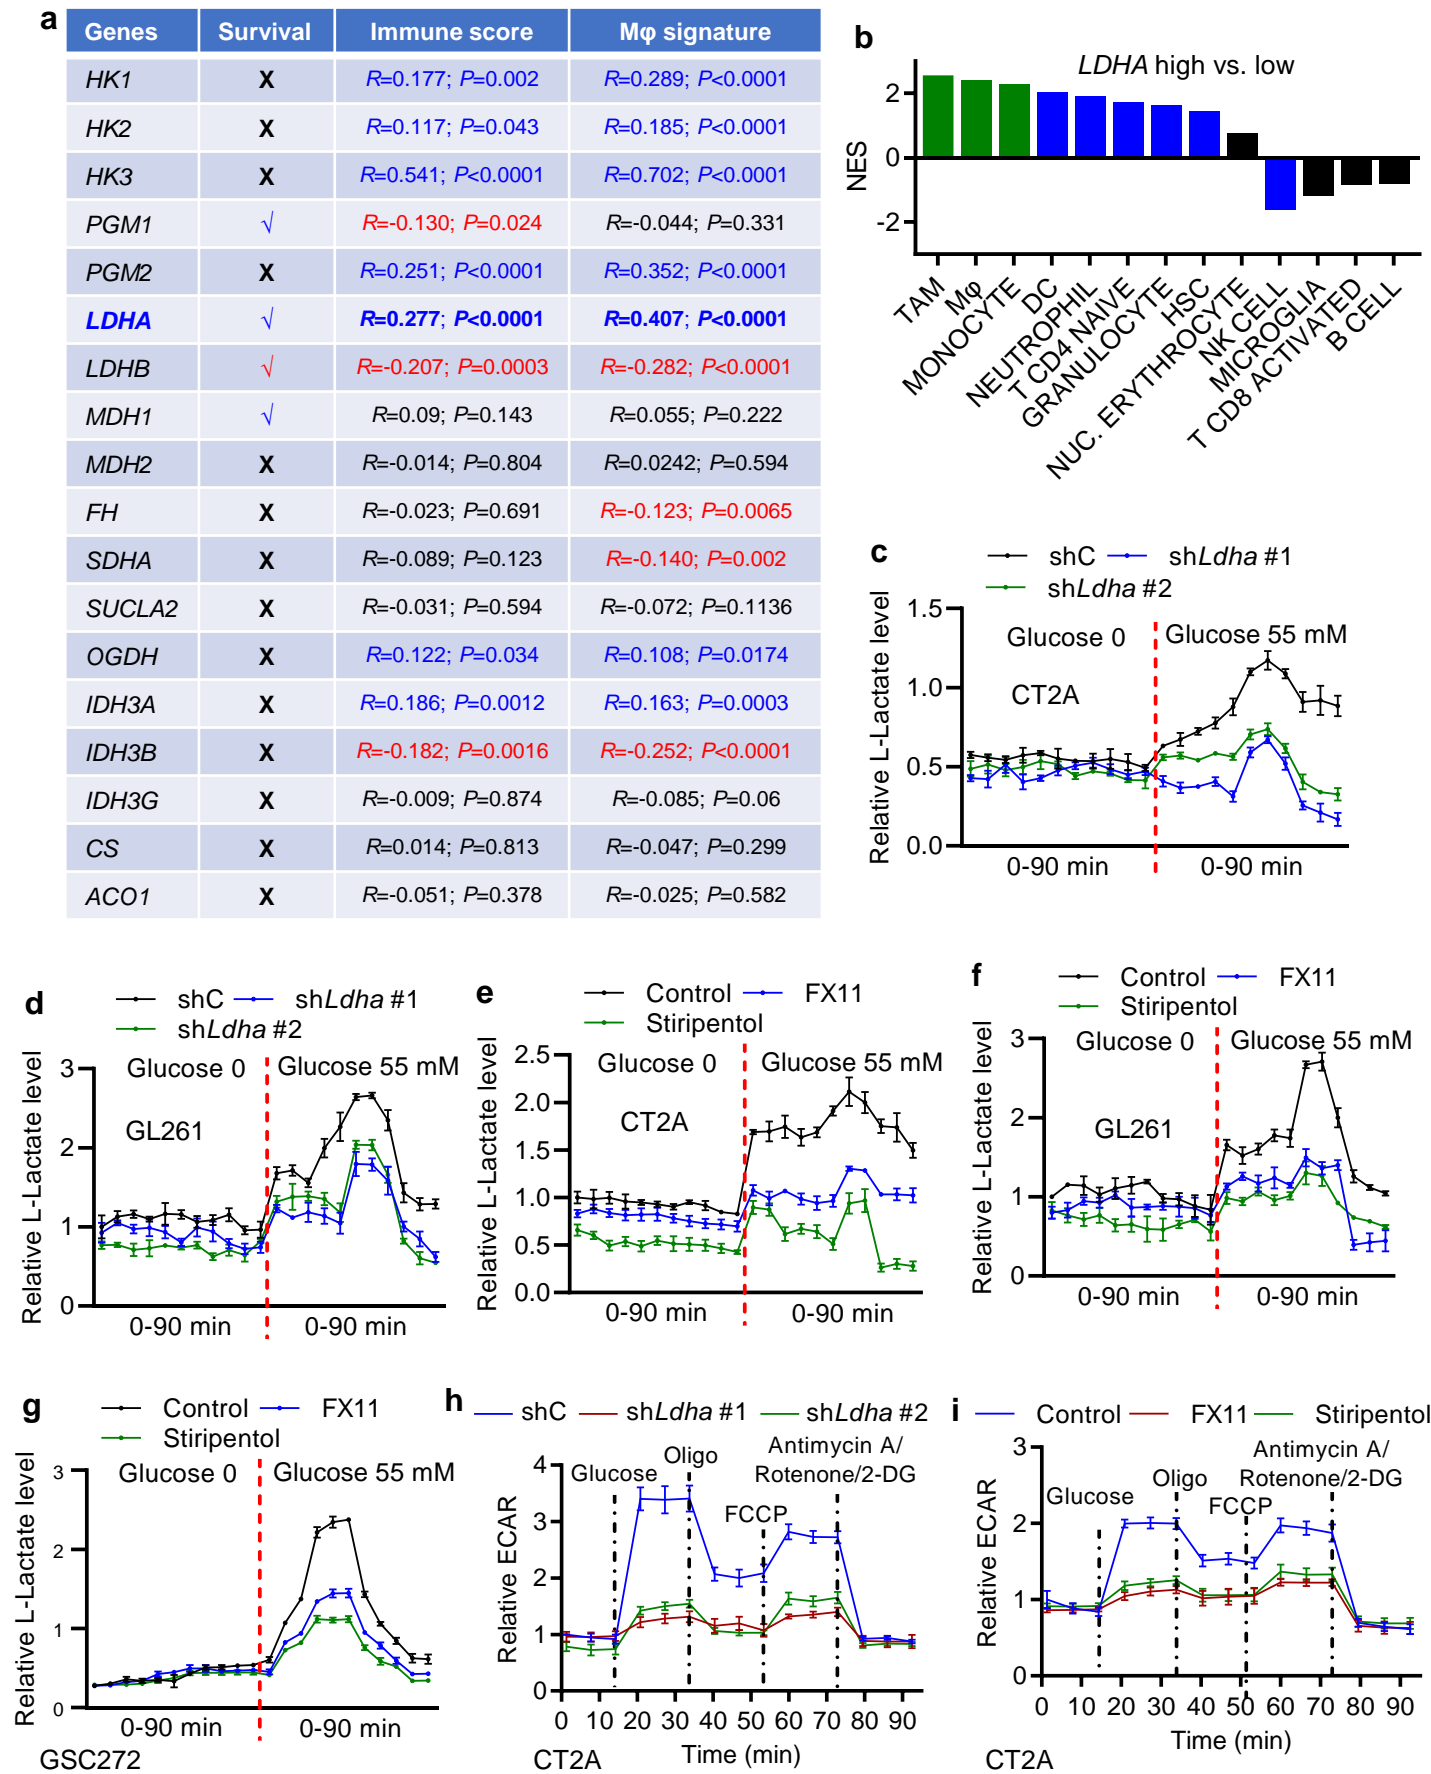

**Supplementary Fig. S3. LDHA regulates glioblastoma cell glycolysis and correlates with macrophage signature in glioblastoma patients.** **(a)** The correlation analysis between key glycolysis and TCA enzymes (e.g., HK1, HK2, HK3, PGM1, PGM2, LDHA, LDHB, MDH1, MDH2, FH, SDHA, SUCLA2, OGDH, IDH3A, IDH3B, IDH3G, CS, and ACO1) with patient survival, immune score, and macrophage signature in TCGA glioblastoma dataset (n = 478). Pearson's correlation test and log-rank test were used for correlation and survival analysis, respectively. X and  $\checkmark$  indicate no and negative correlation with survival, respectively. *R* and *P* values are shown. Blue and red colors indicate positive and negative correlation, respectively. **(b)** GSEA analysis for distinct types of immune cells *LDHA*-high (n = 119) and -low (n = 119) patients in TCGA glioblastoma dataset. **(c, d)** Glycolytic activity assay on CT2A **(c)** and GL261 **(d)** cells expressing shRNA control (shC) and *Ldha* shRNAs (sh*Ldha*) in the presence or absence of glucose (55 mM). n = 3 independent samples. **(e-g)** Glycolytic activity assay on CT2A cells **(e)**, GL261 cells **(f)** and GSC272 **(g)** treated with or without LDHA inhibitor FX11 (8  $\mu$ M) or stiripentol (10  $\mu$ M) in the presence or absence of glucose (55 mM). n = 3 independent samples. **(h)** Extracellular acidification rate (ECAR) of CT2A cells expressing shC and sh*Ldha*. ECAR was obtained from the Seahorse experiments and glucose was added at indicated time point. n = 6 independent samples. **(i)** ECAR of CT2A cells treated with or without LDHA inhibitor FX11 (8  $\mu$ M) or stiripentol (10  $\mu$ M). ECAR was obtained from the Seahorse experiments and glucose was added at indicated time point. n = 6 independent samples. The experiments for (h and i) were independently repeated at least three times. Statistical analyses were determined by Pearson's correlation test and log-rank test (a). Source data are provided as a Source Data file.

**Supplementary Information Fig. 4**

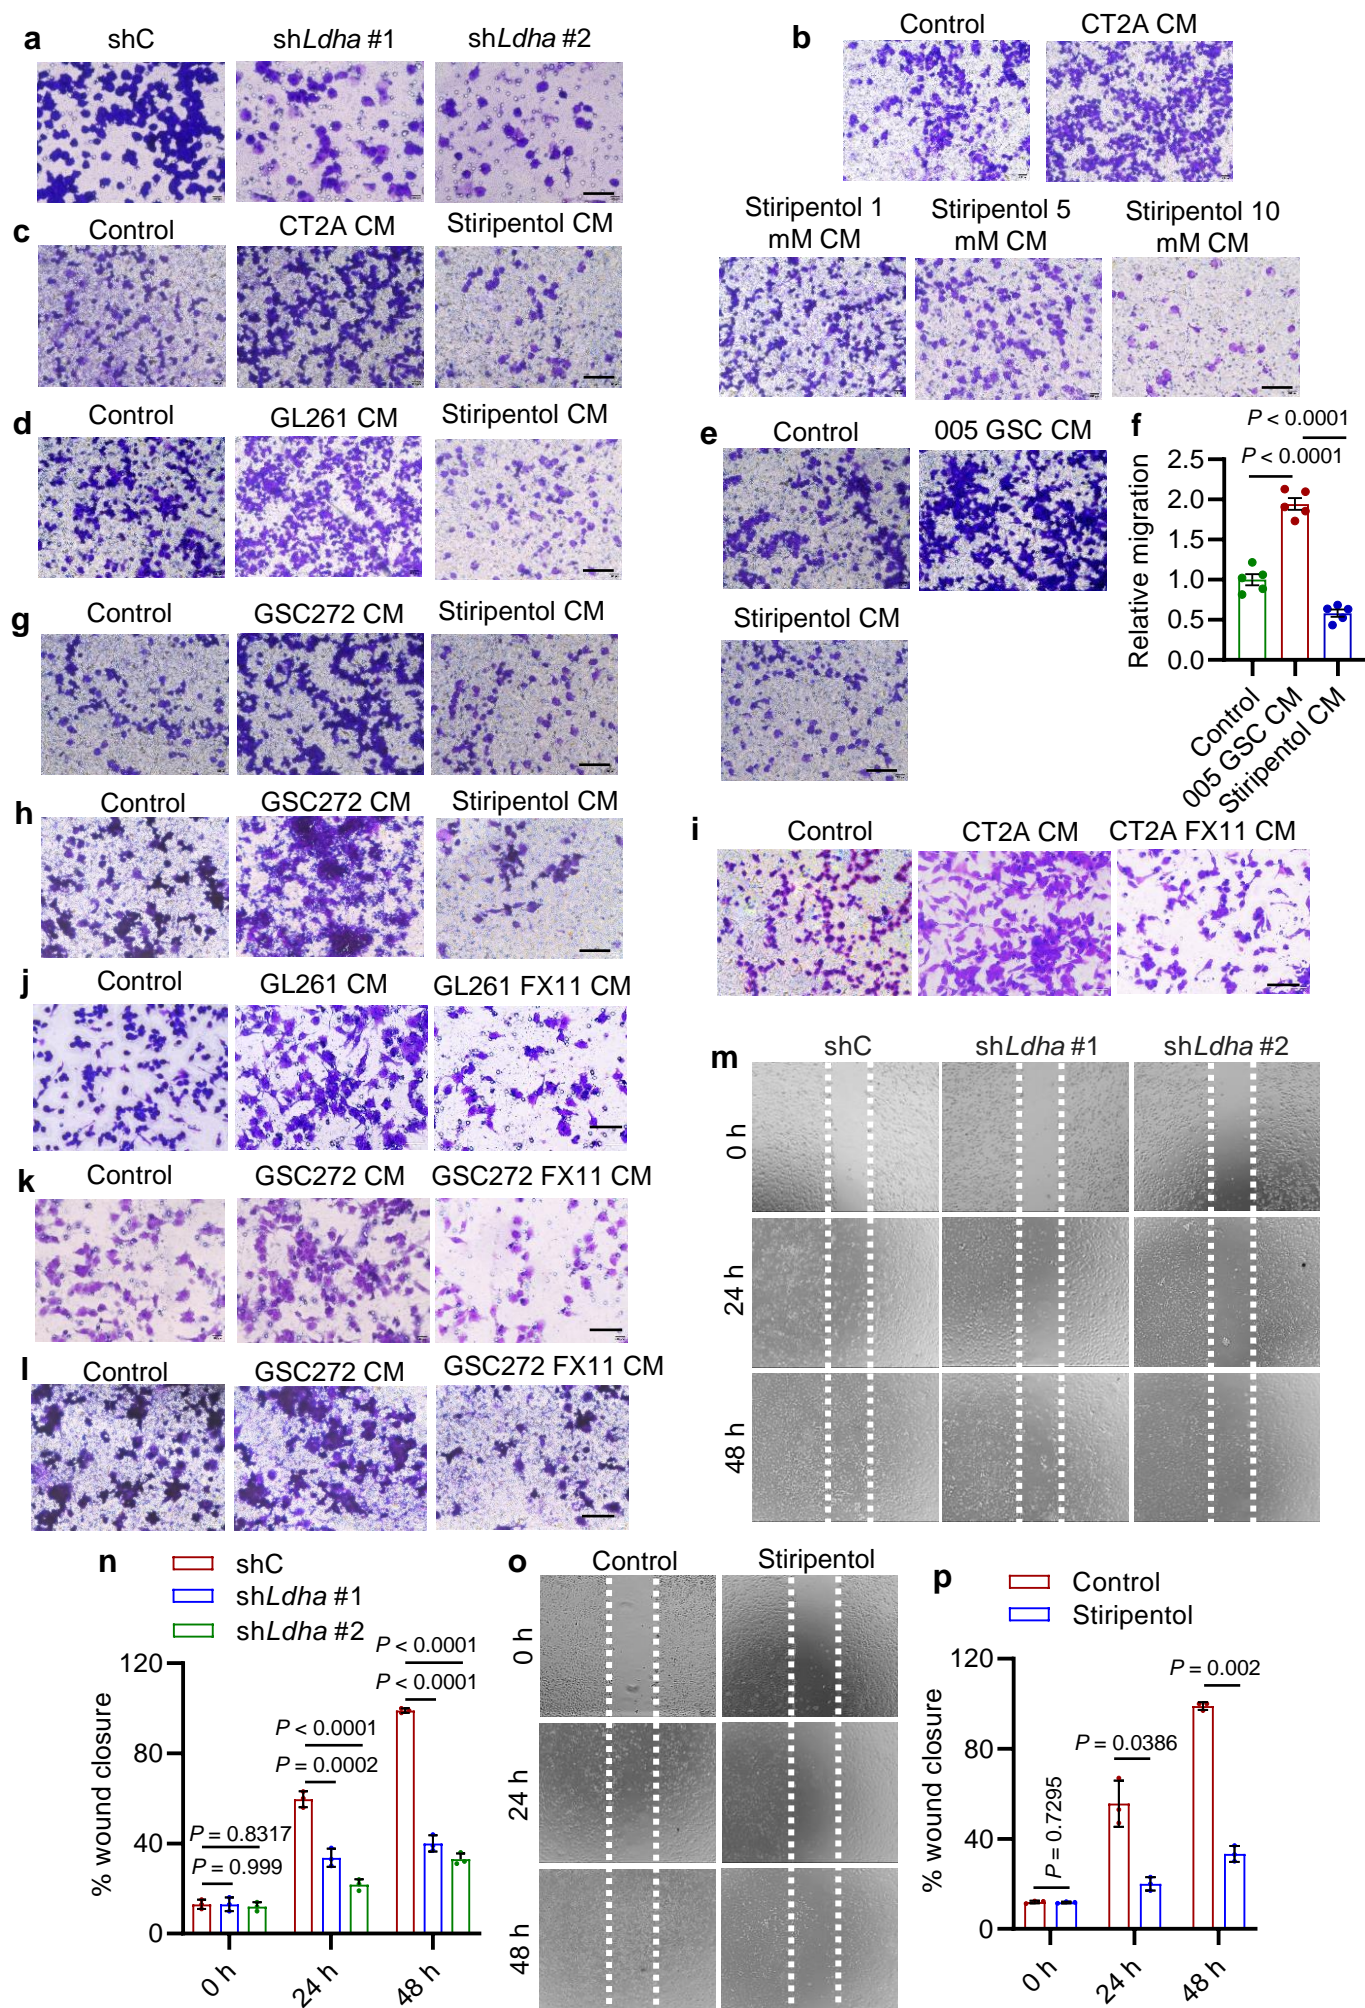

**Supplementary Fig. S4. Glioblastoma cell LDHA inhibition impairs macrophage migration. (a)** Representative images of the migration of Raw264.7 macrophages from a transwell analysis following stimulation with CM from GL261 cells expressing shRNA control (shC) and *Ldha* shRNAs (sh*Ldha*). Scale bar, 100  $\mu$ m. **(b)** Representative images of the migration of Raw264.7 macrophages from a transwell analysis following stimulation with CM from CT2A cells treated with or without stiripentol at indicated concentrations. Scale bar, 100  $\mu$ m. **(c, d)** Representative images of the migration of primary mouse bone marrow-derived macrophages (BMDMs) and Raw264.7 macrophages from a transwell analysis following stimulation with CM from CT2A **(c)** and GL261 **(d)** cells, respectively, treated with or without stiripentol (10  $\mu$ M). Scale bar, 100  $\mu$ m. **(e, f)** Representative images **(e)** and quantification **(f)** of migration of Raw264.7 macrophages from a transwell analysis following stimulation with CM from 005 GSCs treated with or without stiripentol (10  $\mu$ M). Scale bar, 100  $\mu$ m.  $n = 5$  independent samples. **(g, h)** Representative images of the migration of THP-1 macrophages **(g)** and primary human BMDMs **(h)** from a transwell analysis following stimulation with CM from GSC272 treated with or without stiripentol (10  $\mu$ M). Scale bar, 100  $\mu$ m. **(i, j)** Representative images of the migration of Raw264.7 macrophages from a transwell analysis following stimulation with CM from CT2A **(i)** or GL261 **(j)** cells treated with or without FX11 (8  $\mu$ M). Scale bar, 100  $\mu$ m. **(k, l)** Representative images of the migration of THP-1 macrophages **(k)** and primary human BMDMs **(l)** from a transwell analysis following stimulation with CM from GSC272 treated with or without FX11 (8  $\mu$ M). Scale bar, 100  $\mu$ m. **(m, n)** Representative images **(m)** and quantification **(n)** of relative wound healing migration of Raw264.7 macrophages from a scratch assay analysis following stimulation with CM from CT2A cells expressing shC and sh*Ldha*.  $n = 3$  independent samples. **(o, p)** Representative images **(o)** and quantification **(p)** of relative wound healing migration of Raw264.7 macrophages from a scratch assay analysis following stimulation with CM from CT2A cells treated with or without stiripentol (10  $\mu$ M)  $n = 3$  independent samples. A representative example of five and three replicates is shown for (a-e and h-l) and (m and o), respectively. The experiments were independently repeated at least two times. Data from multiple replicates are presented as mean  $\pm$  SEM. Statistical analyses were determined by one-way ANOVA test (f, n) and Student's t-test (p). Source data are provided as a Source Data file.

Supplementary Information Fig. 5

a

| Genes  | Survival | Mφ signature           |
|--------|----------|------------------------|
| CCL2   | ✓        | $R=0.718$ ; $P<0.0001$ |
| CCL7   | ✓        | $R=0.683$ ; $P<0.0001$ |
| IL1B   | ✗        | $R=0.569$ ; $P<0.0001$ |
| IL1RAP | ✓        | $R=0.387$ ; $P<0.0001$ |
| IL1RN  | ✗        | $R=0.576$ ; $P<0.0001$ |
| MMP9   | ✗        | $R=0.385$ ; $P<0.0001$ |
| NPY    | ✗        | $R=-0.032$ ; $P=0.477$ |
| PLAU   | ✓        | $R=0.624$ ; $P<0.0001$ |
| PROS1  | ✗        | $R=0.537$ ; $P<0.0001$ |
| S100A8 | ✓        | $R=0.734$ ; $P<0.0001$ |
| SLPI   | ✗        | $R=0.509$ ; $P<0.0001$ |

b

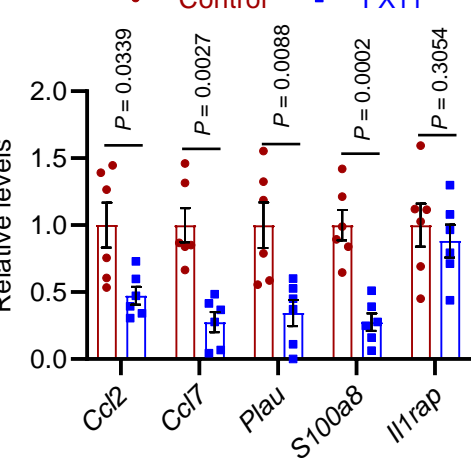

c

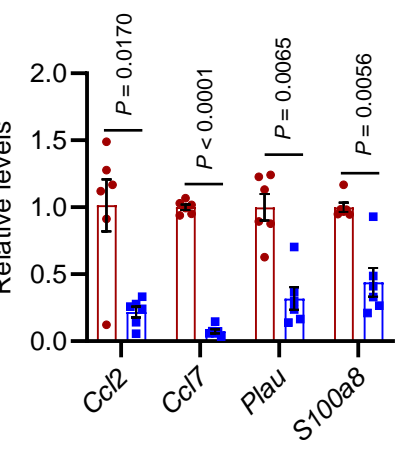

d

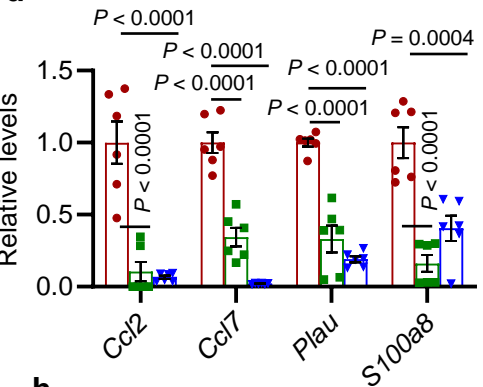

e

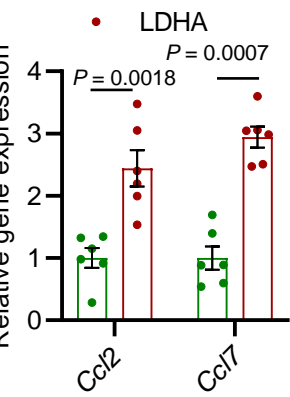

f

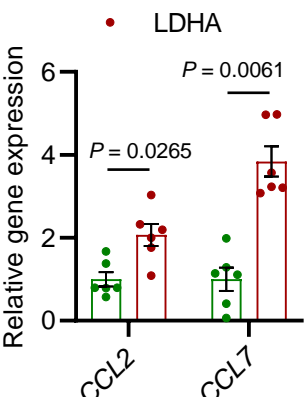

g

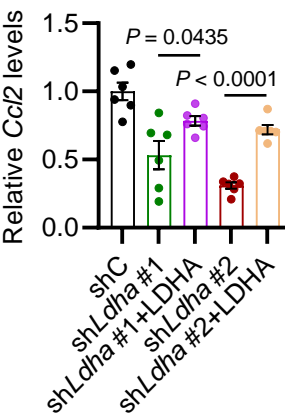

h

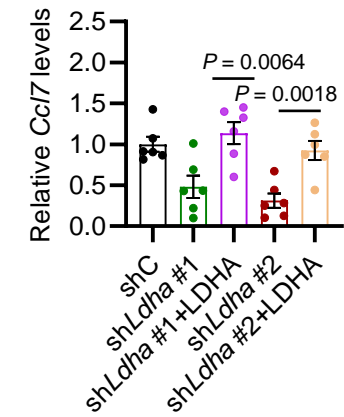

i

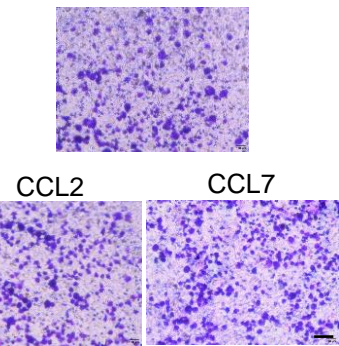

j

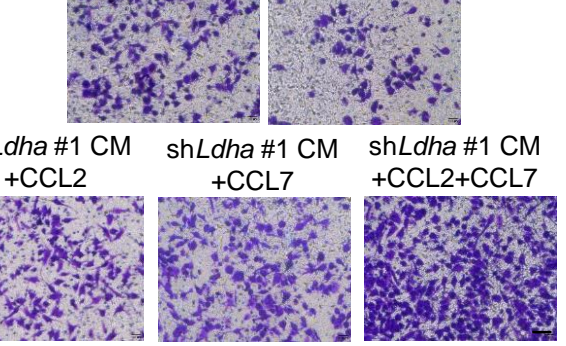

k

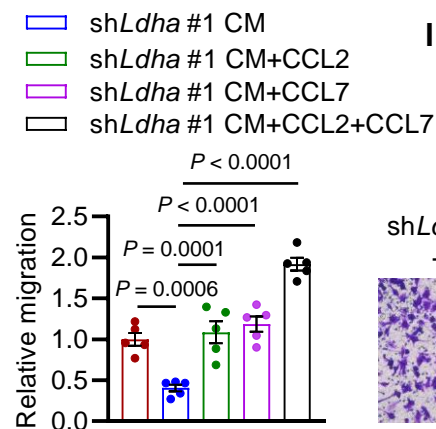

l

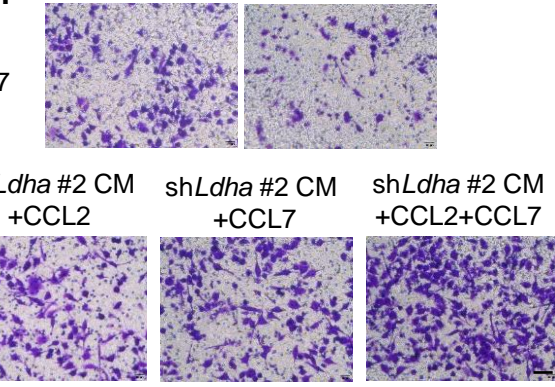

m

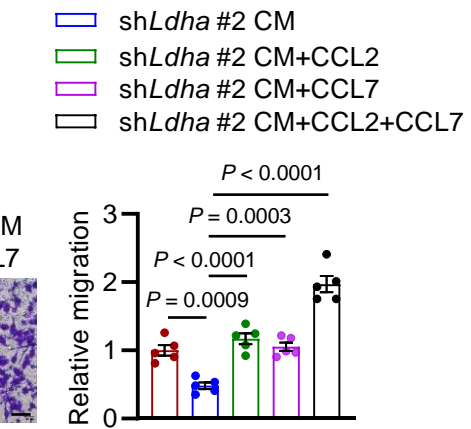

**Supplementary Fig. S5. CCL2 and CCL7 are the key chemokines responsible for LDHA-induced macrophage migration.** (a) The correlation analysis between cytokines (e.g., *CCL2*, *CCL7*, *IL1B*, *IL1RAP*, *IL1RN*, *MMP9*, *NPY*, *PLAU*, *PROS1*, *S100A8* and *SLPI*) with patient survival and macrophage signature in TCGA glioblastoma dataset (n = 478). Pearson's correlation test and log-rank test were used for correlation and survival analysis, respectively. X and √ indicate no and negative correlation with survival, respectively. *R* and *P* values are shown. Blue colors indicate positive correlation. (b) RT-qPCR for *Ccl2*, *Ccl7*, *Il1rap*, *Plau*, and *S100a8* in control and FX11-treated GL261 cells. The values were expressed as the fold change. n = 6 independent samples. (c) RT-qPCR for *Ccl2*, *Ccl7*, *Plau*, and *S100a8* in control and stiripentol-treated GL261 cells. The values were expressed as the fold change. n = 6 independent samples. (d) RT-qPCR for *Ccl2*, *Ccl7*, *Plau*, and *S100a8* in GL261 cells expressing shRNA control (shC) and *Ldha* shRNAs (sh*Ldha*). The values were expressed as the fold change. n = 6 independent samples. (e, f) RT-qPCR for *CCL2* and *CCL7* in CT2A cells (e) and GSC272 (f) treated with or without LDHA recombinant protein (10 ng/ml). n = 6 independent samples. (g, h) RT-qPCR for *Ccl2* (g) and *Ccl7* (h) in shC and sh*Ldha* CT2A cells treated with or without LDHA recombinant protein (10 ng/ml). n = 6 independent samples. (i) Representative transwell migration images of THP-1 macrophages following stimulation with recombinant CCL2 and CCL7 proteins (10 ng/ml). Scale bar, 100 μm. (j-m) Representative images (j, l) and quantification (k, m) of relative migration of Raw264.7 macrophages from a transwell analysis following stimulation with CM from shC and sh*Ldha* CT2A cells in the presence or absence of CCL2 or CCL7 recombinant proteins (10 ng/ml). n = 5 independent samples. Scale bar, 100 μm. A representative example of five replicates is shown for (l, j, and l). The experiments for (b–d and g–m) were independently repeated at least two times. Data from multiple replicates are presented as mean ± SEM. Statistical analyses were determined by Pearson's correlation test, log-rank test (a), Student's t-test (b, c, e, f), and one-way ANOVA test (d, g, h, k, m). Source data are provided as a Source Data file.

Supplementary Information Fig. 6

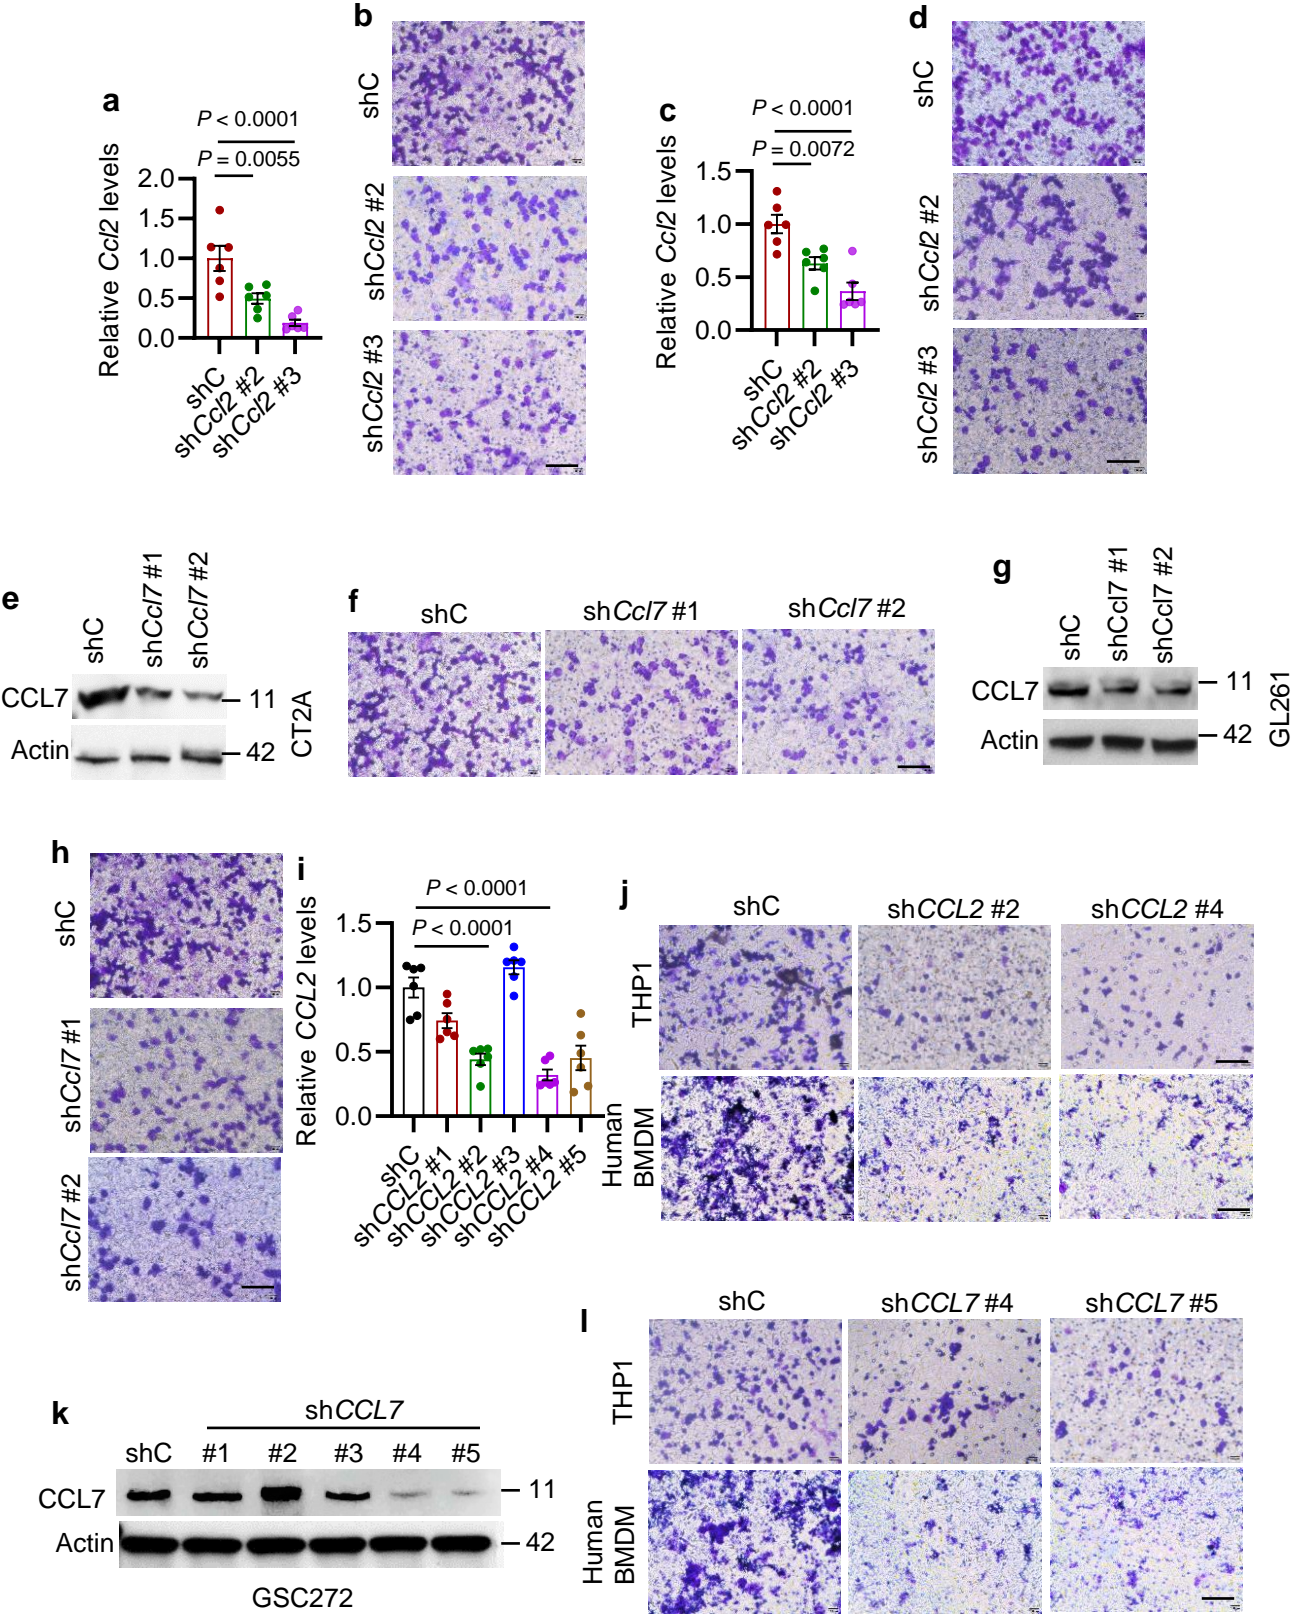

**Supplementary Fig. S6. Depletion of glioblastoma cell CCL2 and CCL7 reduces macrophage infiltration.** **(a)** RT-qPCR for *Ccl2* in CT2A cells expressing shC and sh*Ccl2*. The values were expressed as the fold change. n = 6 independent samples. **(b)** Representative transwell migration images of Raw264.7 macrophages following stimulation with conditioned media (CM) from CT2A cells expressing shC and sh*Ccl2*. Scale bar, 100  $\mu$ m. **(c)** RT-qPCR for *Ccl2* in GL261 cells expressing shC and sh*Ccl2*. The values were expressed as the fold change. n = 6 independent samples. **(d)** Representative transwell migration images of Raw264.7 macrophages following stimulation with CM from GL261 cells expressing shC and sh*Ccl2*. Scale bar, 100  $\mu$ m. **(e)** Immunoblots of CCL7 in CT2A cells expressing shC and sh*Ccl7*. **(f)** Representative transwell migration images of Raw264.7 macrophages following stimulation with CM from CT2A cells expressing shC and sh*Ccl7*. Scale bar, 100  $\mu$ m. **(g)** Immunoblots of CCL7 in GL261 cells expressing shC and sh*Ccl7*. **(h)** Representative transwell migration images of Raw264.7 macrophages following stimulation with CM from GL261 cells expressing shC and sh*Ccl7*. Scale bar, 100  $\mu$ m. **(i)** RT-qPCR for *CCL2* in GSC272 expressing shC and sh*CCL2*. The values were expressed as the fold change. n = 6 independent samples. **(j)** Representative transwell migration images of THP-1 macrophages and human primary BMDMs following stimulation with CM from GSC272 expressing shC and sh*CCL2*. Scale bar, 100  $\mu$ m. **(k)** Immunoblots of CCL7 in GSC272 expressing shC and sh*CCL7*. **(l)** Representative transwell migration images of THP-1 macrophages and human primary BMDMs following stimulation with CM from GSC272 expressing shC and sh*CCL7*. Scale bar, 100  $\mu$ m. A representative example of five and three replicates is shown for (b, d, f, h, j, and l) and (e, g, and k), respectively. The experiments were independently repeated at least two to three times. Data from multiple replicates are presented as mean  $\pm$  SEM. Statistical analyses were determined by one-way ANOVA test (a, c, i). Source data are provided as a Source Data file.

Supplementary Information Fig. 7

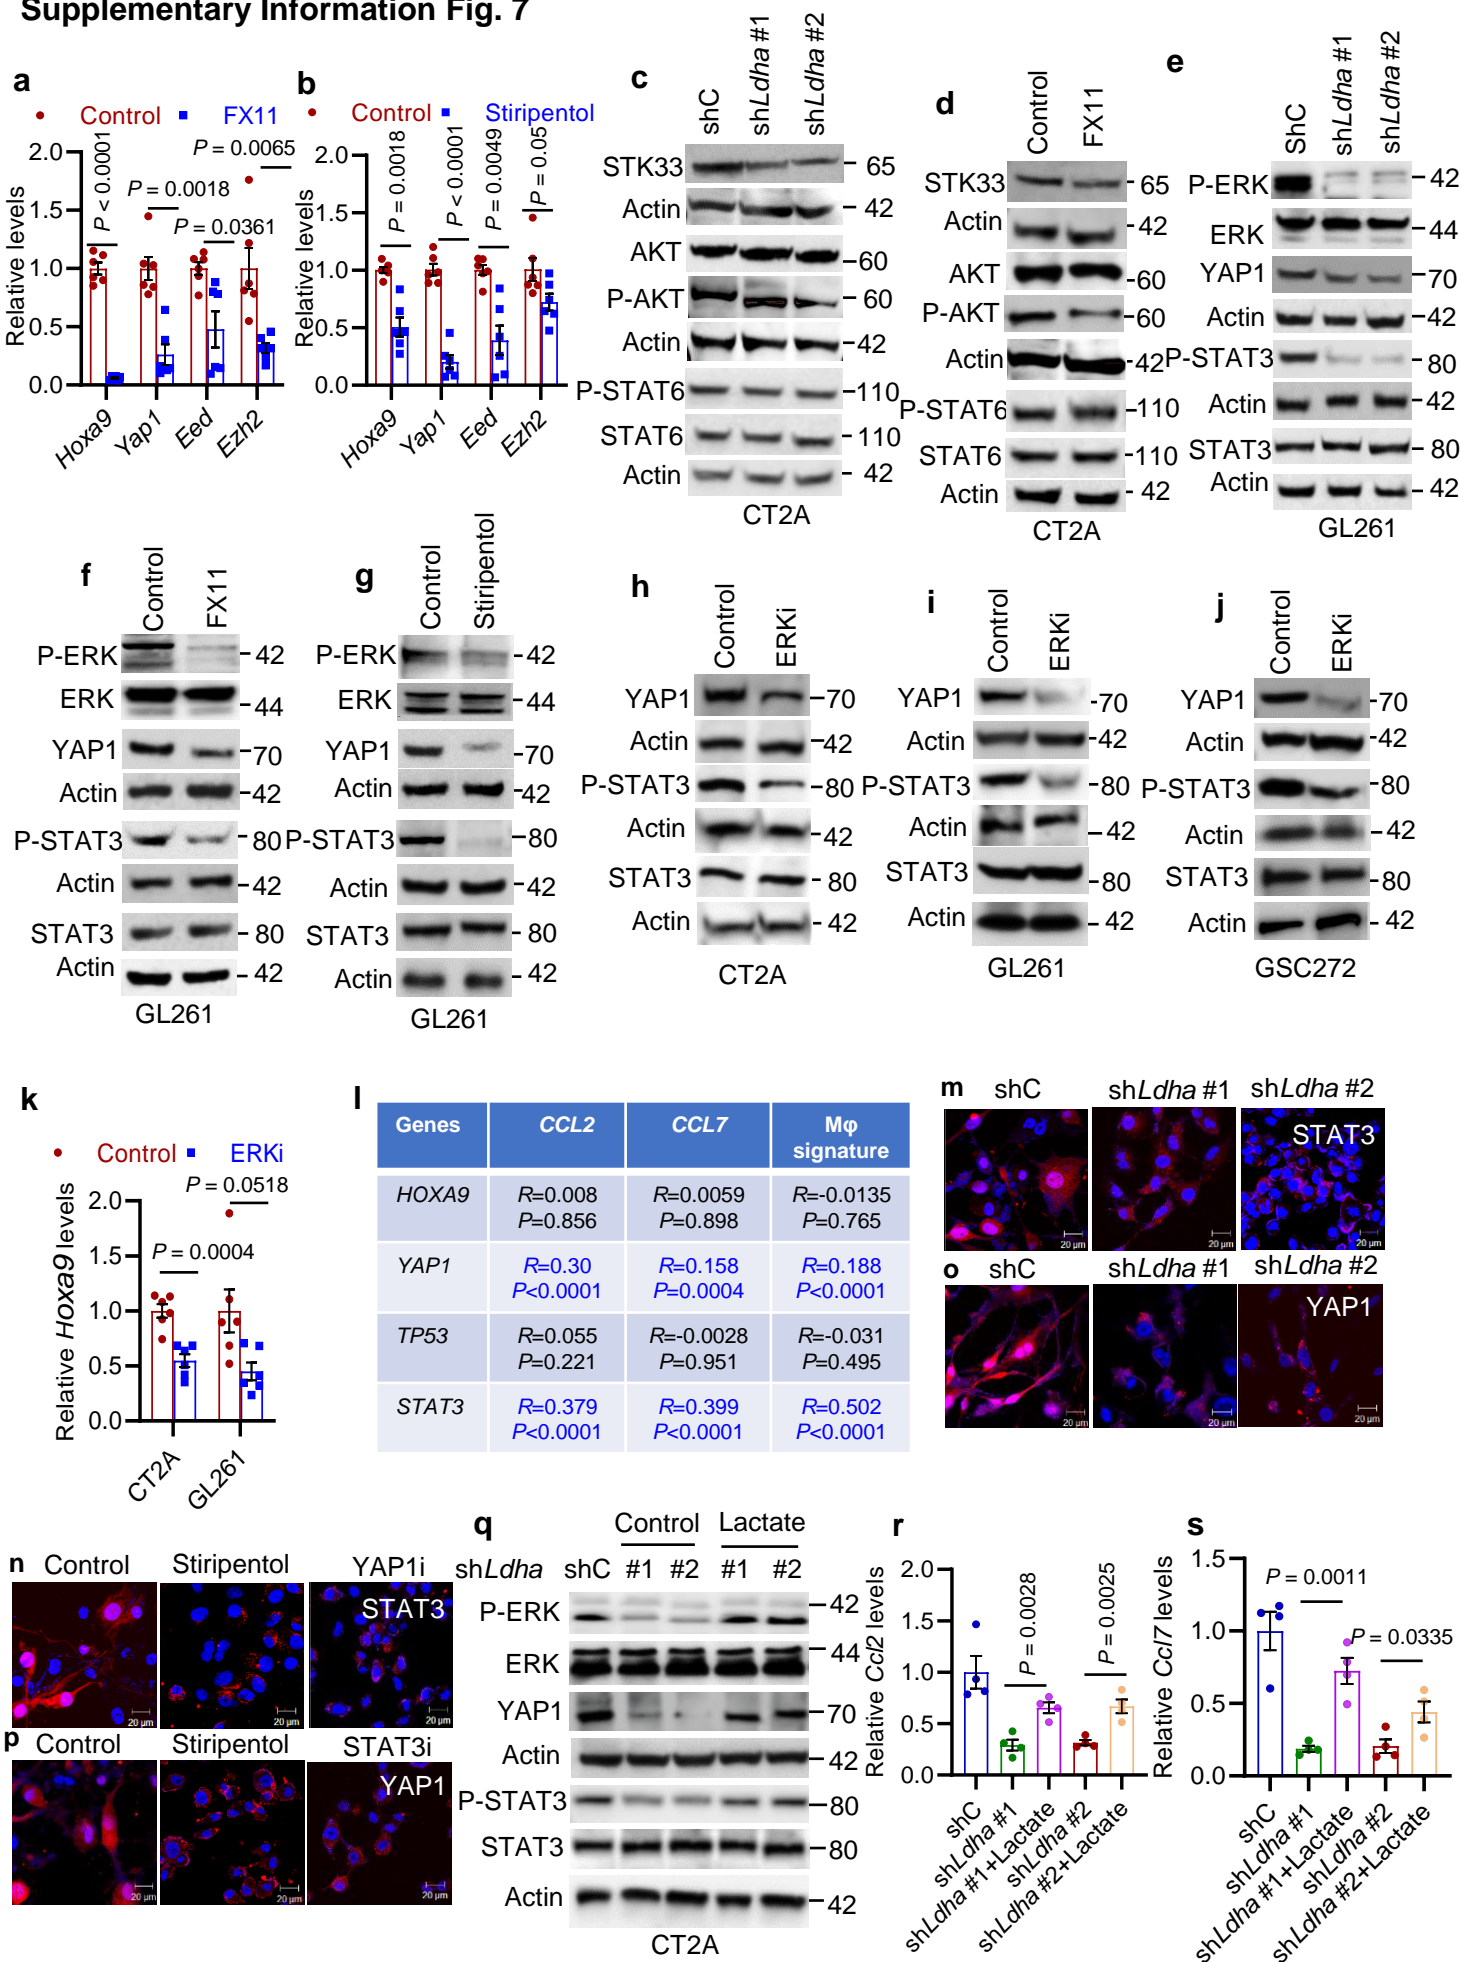

**Supplementary Fig. S7. YAP1 and STAT3 regulate LDHA-lactate-ERK axis-induced CCL2 and CCL7 expression.** (a) RT-qPCR for *Hoxa9*, *Yap1*, *Eed*, and *Ezh2* in control and FX11-treated GL261 cells. The values were expressed as the fold change. n = 6 independent samples. (b) RT-qPCR for *Hoxa9*, *Yap1*, *Eed*, and *Ezh2* in control and stiripentol-treated GL261 cells. The values were expressed as the fold change. n = 6 independent samples. (c) Immunoblots of STK33, AKT, P-AKT, STAT6, and P-STAT6 in CT2A cells expressing shRNA control (shC) and *Ldha* shRNAs (sh*Ldha*). (d) Immunoblots of STK33, AKT, P-AKT, STAT6, and P-STAT6 in CT2A cells treated with or without FX11 (8  $\mu$ M). (e) Immunoblots of P-ERK, ERK, YAP1, P-STAT3, and STAT3 in GL261 cells expressing shC and sh*Ldha*. (f, g) Immunoblots of P-ERK, ERK, YAP1, P-STAT3, and STAT3 in GL261 cells treated with or without FX11 (f) or stiripentol (g) at 8 and 10  $\mu$ M, respectively. (h) Immunoblots of YAP1, P-STAT3, and STAT3 in CT2A cells treated with or without ERK inhibitor (ERKi) raxoxertinib (1.5  $\mu$ M). (i) Immunoblots of YAP1, P-STAT3, and STAT3 in GL261 cells treated with or without ERKi raxoxertinib (1.5  $\mu$ M). (j) Immunoblots of YAP1, P-STAT3, and STAT3 in GSC272 treated with or without ERKi raxoxertinib (1.5  $\mu$ M). (k) RT-qPCR for *Hoxa9* in control and ERKi raxoxertinib (1.5  $\mu$ M)-treated CT2A and GL261 cells. The values were expressed as the fold change. n = 6 independent samples. (l) The correlation analysis between *Hoxa9*, *YAP1*, *TP53*, and *STAT3* with *CCL2*, *CCL7*, and macrophage signature in TCGA glioblastoma dataset (n = 478). *R* and *P* values are shown. Blue colors indicate positive correlation. (m) Immunofluorescence for STAT3 in CT2A cells expressing shC or sh*Ldha*. Scale bar, 20  $\mu$ m. (n) Immunofluorescence for STAT3 in CT2A cells treated with or without stiripentol (10  $\mu$ M) or YAP-TEAD interaction inhibitor (YAP1i) verteporfin (1  $\mu$ M). Scale bar, 20  $\mu$ m. (o) Immunofluorescence for YAP1 in CT2A cells expressing shC or sh*Ldha*. Scale bar, 20  $\mu$ m. (p) Immunofluorescence for YAP1 in CT2A cells treated with or without stiripentol (10  $\mu$ M) or STAT3 inhibitor (STAT3i) WP1066 (10  $\mu$ M). Scale bar, 20  $\mu$ m. (q) Immunoblots of P-ERK, ERK, YAP1, P-STAT3, STAT3, and actin in LDHA-depleted (sh*Ldha*) CT2A cells treated with or without lactate (1 mM). (r, s) RT-qPCR for *Ccl2* (r) and *Ccl7* (s) in CT2A cells expressing shC and sh*Ldha* treated with or without lactate (1 mM). n = 4 independent samples. A representative example of three replicates is shown for (c-j and m-q). The experiments were independently repeated at least two to three times. Data from multiple replicates are presented as mean  $\pm$  SEM. Statistical analyses were determined by Student's t-test (a, b, k, r, s) and Pearson's correlation test (l). Source data are provided as a Source Data file.

Supplementary Information Fig. 8

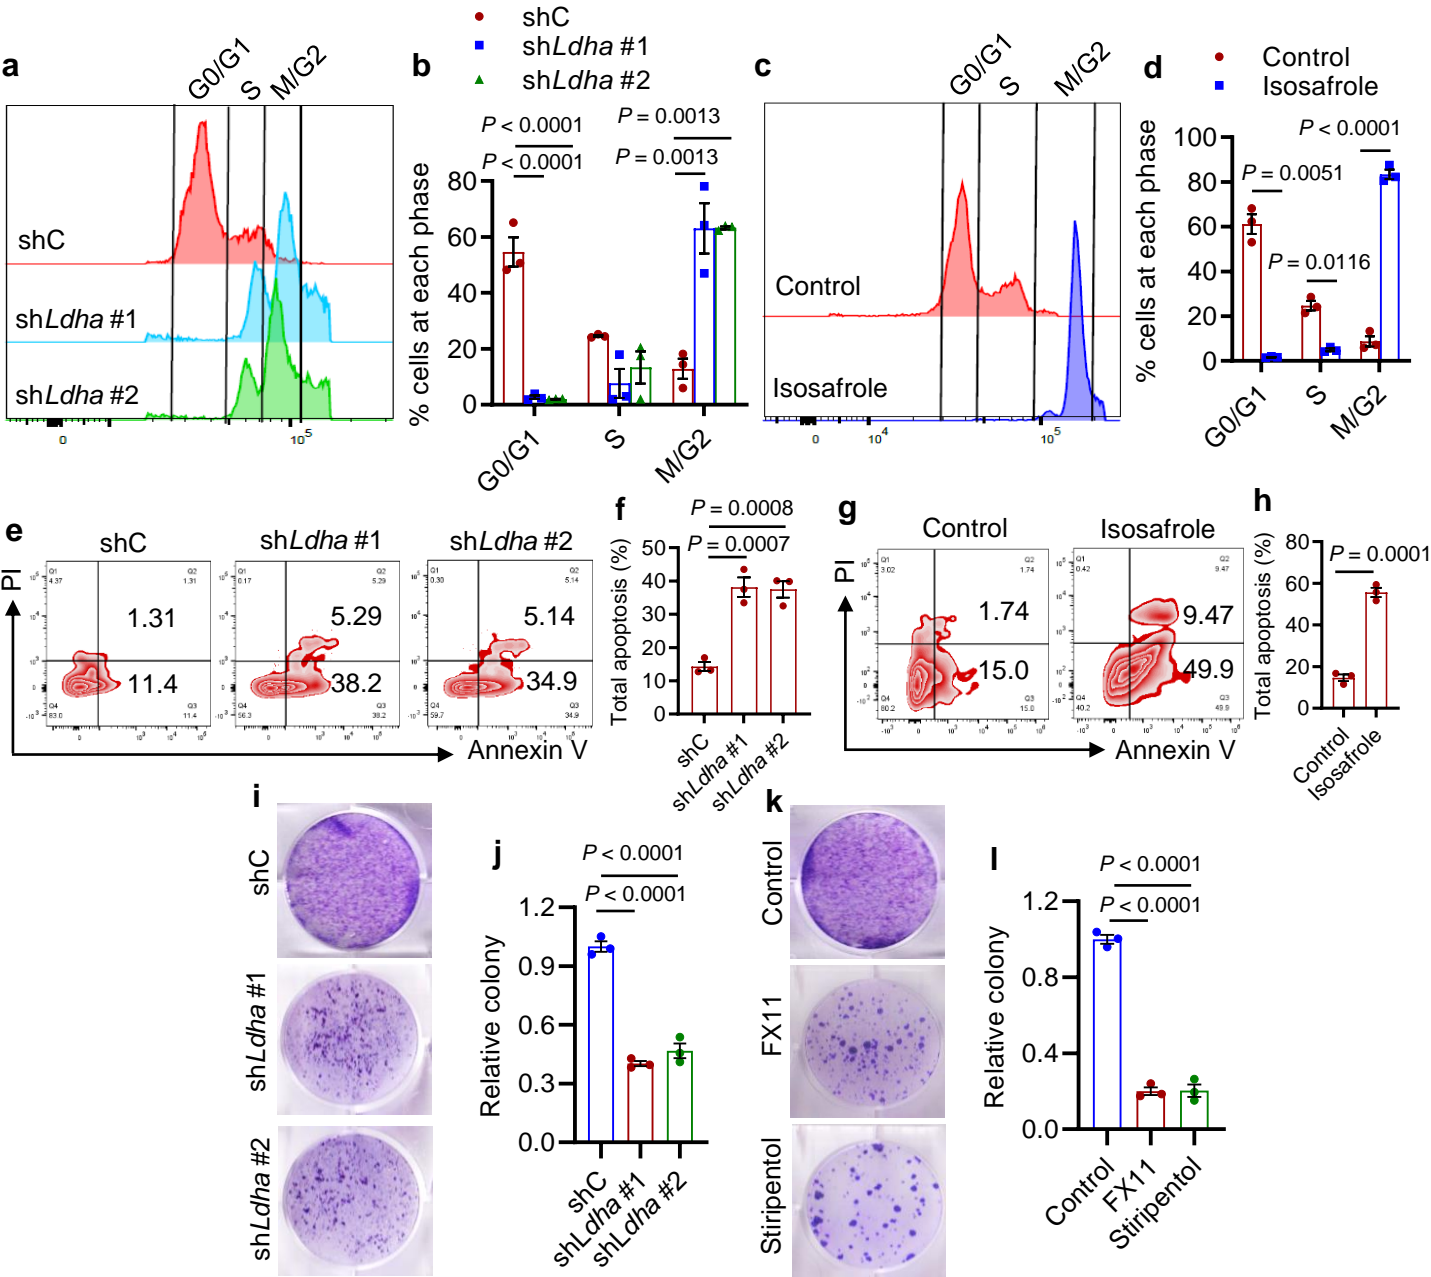

**Supplementary Fig. S8. Inhibition of glioblastoma cell LDHA affects cell cycle, apoptosis, and proliferation.** (a, b) Representative images (a) and quantification (b) of flow cytometry cell cycle analysis in CT2A cells expressing shRNA control (shC) and *Ldha* shRNAs (shLdha). n = 3 independent samples. (c, d) Representative images (c) and quantification (d) of flow cytometry cell cycle analysis in CT2A cells treated with or without isosafrole (10  $\mu$ M). n = 3 independent samples. (e, f) Representative images (e) and quantification (f) of flow cytometry apoptosis analysis in CT2A cells expressing shC and shLdha. n = 3 independent samples. (g, h) Representative images (g) and quantification (h) of flow cytometry apoptosis analysis in CT2A cells treated with or without isosafrole (10  $\mu$ M). n = 3 independent samples. (i, j) Representative images (i) and quantification (j) of colony formation in CT2A cells expressing shC and shLdha. n = 3 independent samples. (k, l) Representative images (k) and quantification (l) of colony formation in CT2A cells treated with or without FX11 (8  $\mu$ M) or stiripentol (10  $\mu$ M). n = 3 independent samples. The experiments were independently repeated at least two times. Data from multiple replicates are presented as mean  $\pm$  SEM. Statistical analyses were determined by one-way ANOVA test (b, f, j, l) and Student's t-test (d, h). Source data are provided as a Source Data file.

Supplementary Information Fig. 9

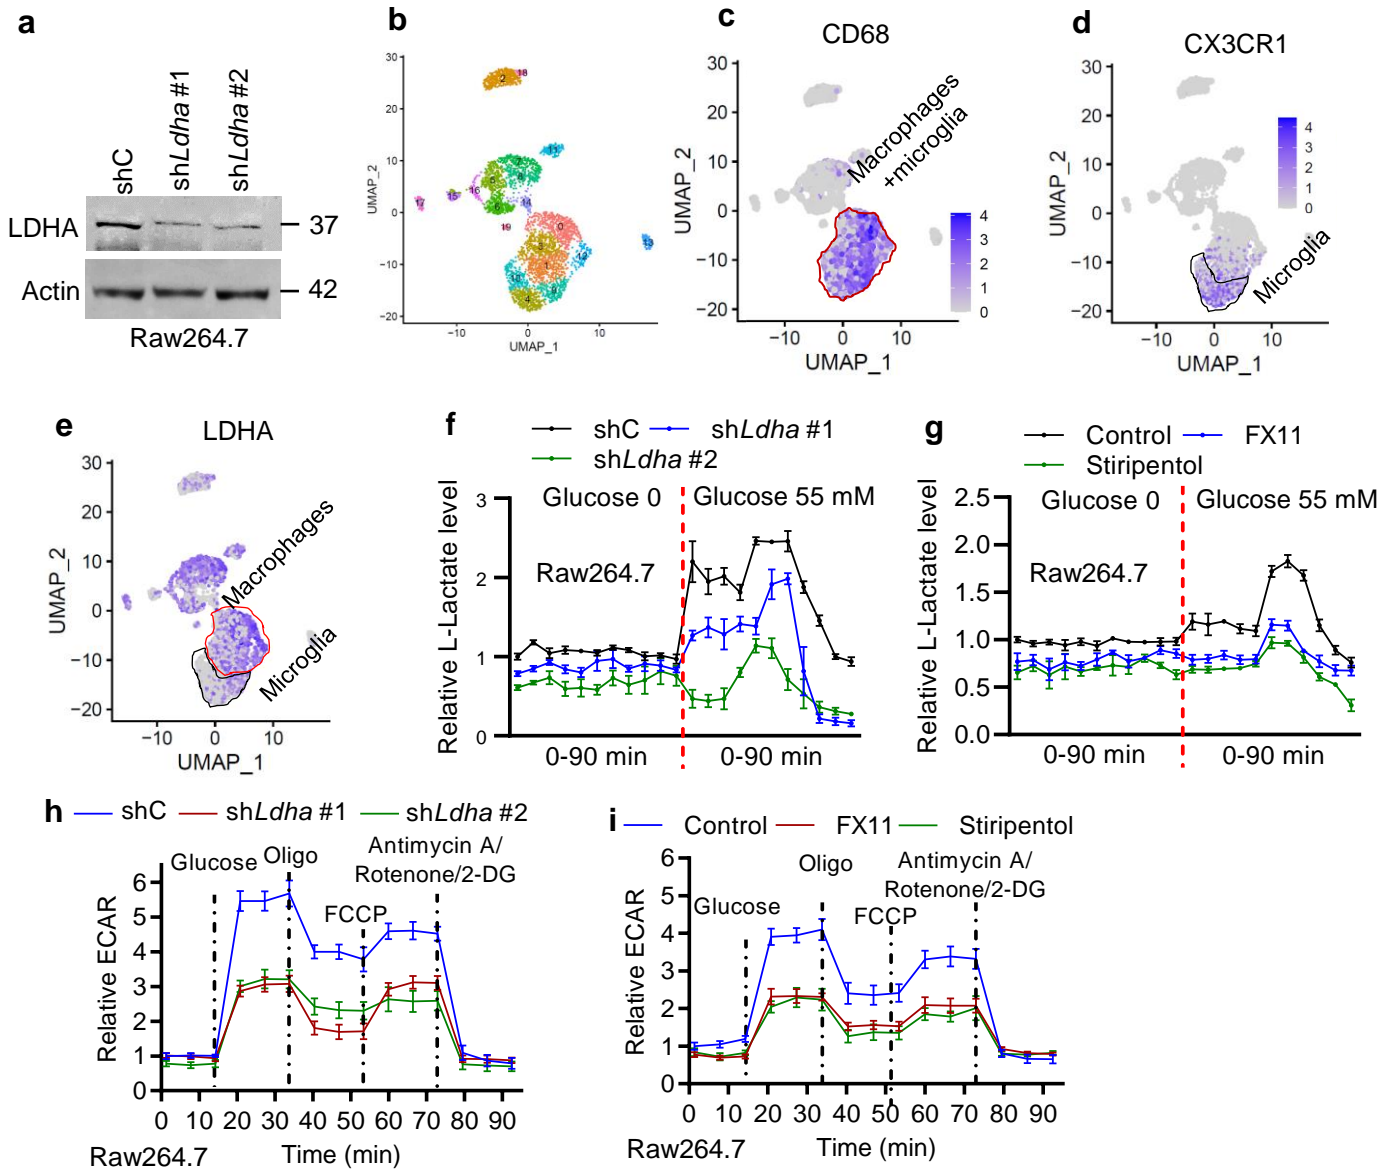

**Supplementary Fig. S9. LDHA is expressed in glioblastoma cells and macrophages, and inhibition of LDHA reduces glycolytic activity in macrophages.** (a) Immunoblots of LDHAi cell lysates of Raw264.7 macrophages expressing shRNA control (shC) and *Ldha* shRNAs (sh*Ldha*). A representative example of three replicates. (b) UMAP dimensional reduction of single cells from tumor samples of a cohort of four glioblastoma patients <sup>41</sup>. (c) UMAP dimensional reduction of macrophage and microglia (as highlighted) on the basis of *CD68* expression pattern. (d) UMAP dimensional reduction of microglia (as highlighted) on the basis of *CX3CR1* expression pattern. (e) Gene expression pattern representing single-cell gene expression of *LDHA* in macrophages, microglia (as highlighted), and other glioblastoma cells. Intensity of the blue color indicates the expression of individual cells. (f) Glycolytic activity (lactate level) assay on Raw264.7 macrophages expressing shC and sh*Ldha* in the presence or absence of glucose (55 mM). n = 3 independent samples. (g) Glycolytic activity (lactate level) assay on Raw264.7 macrophages treated with or without LDHA inhibitor FX11 (8  $\mu$ M) or stiripentol (10  $\mu$ M) in the presence or absence of glucose (55 mM). n = 3 independent samples. (h) Extracellular acidification rate (ECAR) of Raw264.7 macrophages expressing shC and sh*Ldha*. ECAR was obtained from the Seahorse experiments and glucose was added at indicated time point. n = 6 independent samples. (i) ECAR of Raw264.7 macrophages treated with or without LDHA inhibitor FX11 (8  $\mu$ M) or stiripentol (10  $\mu$ M). n = 6 independent samples. ECAR was obtained from the Seahorse experiments and glucose was added at indicated time point. The experiments for (a, h, and i) were independently repeated at least three times. Data from multiple replicates are presented as mean  $\pm$  SEM. Source data are provided as a Source Data file.

# Supplementary Information Fig. 10

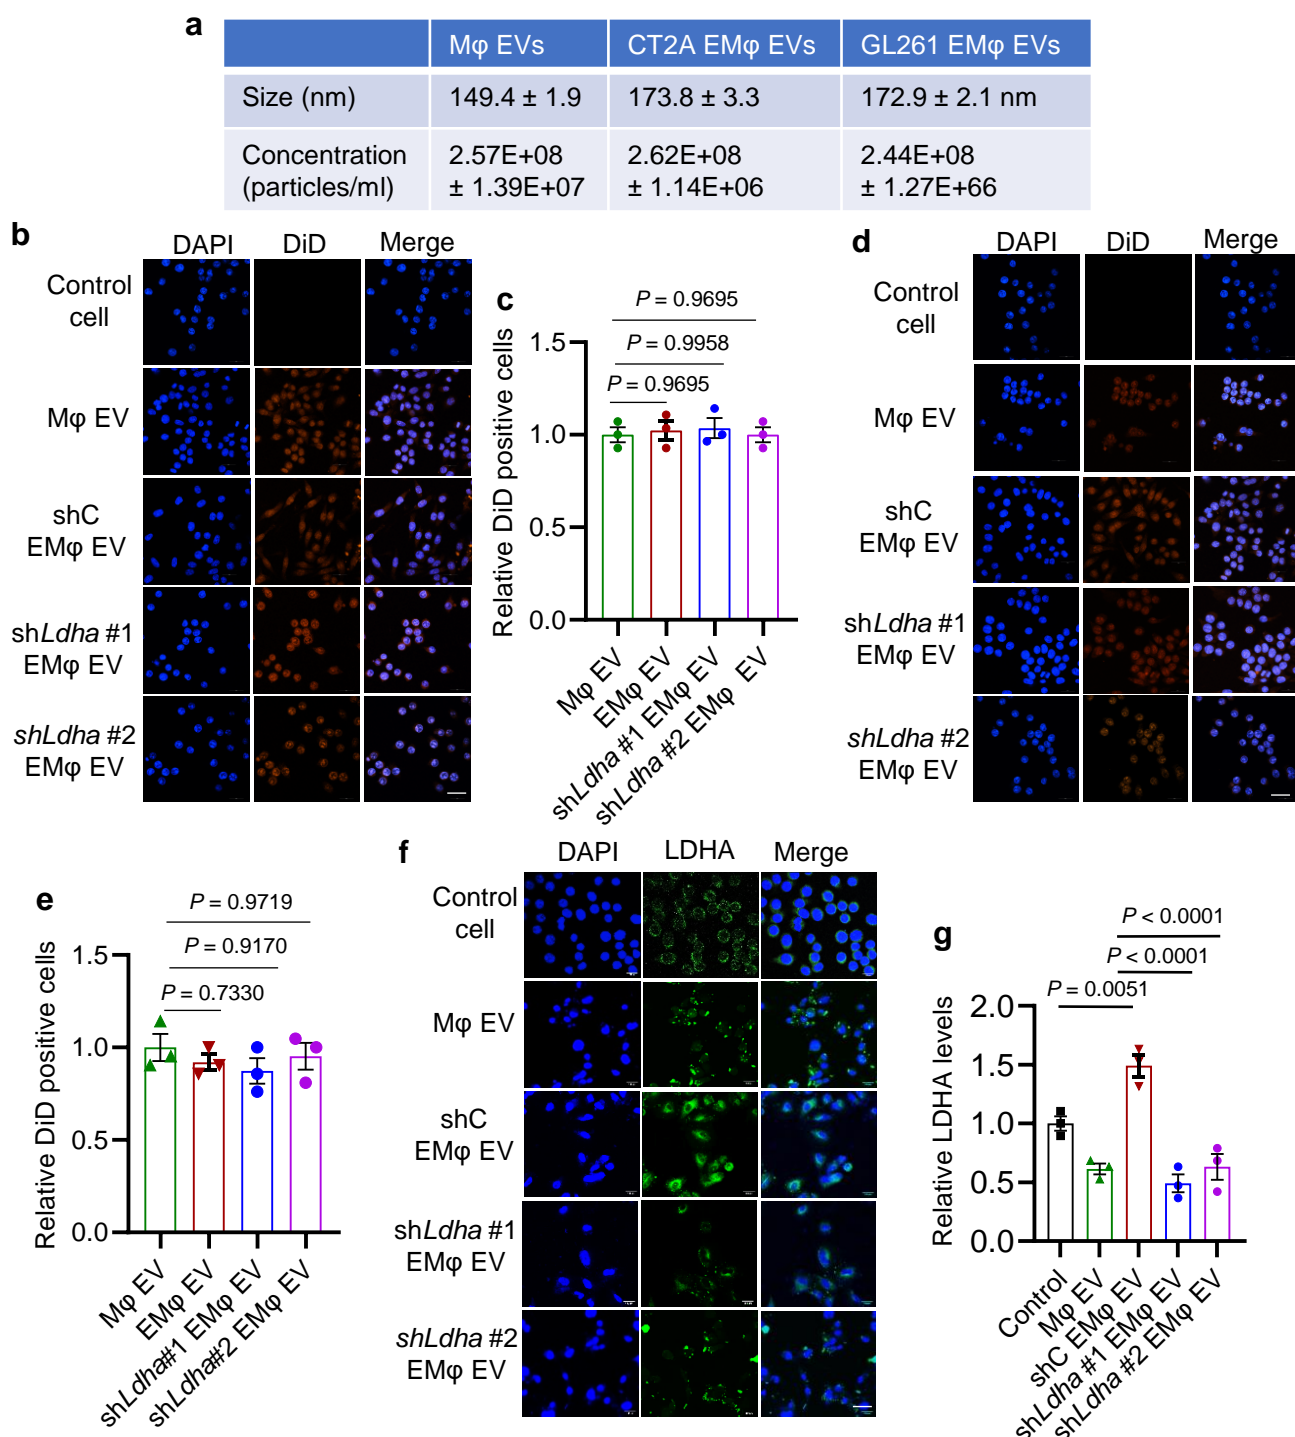

**Supplementary Fig. S10. TAM-derived EVs deliver LDHA from macrophages to glioblastoma cells.** (a) Quantification of average diameter and concentration of extracellular vesicles (EVs) isolated from control Raw264.7 macrophages and CT2A/GL261 conditioned media-educated macrophages (EMφ) based on nanoparticle tracking analysis.  $n = 3$  independent samples. (b, c) Representative (b) and quantification (c) of DiD positive cells out of total CT2A cells incubated with DiD-labeled EVs (500 ng) isolated from Raw264.7 Mφ and EMφ expressing shRNA control (shC) and *Ldha* shRNAs (*shLdha*) for 24 hrs. Scale bar, 200  $\mu\text{m}$ .  $n = 3$  independent samples. (d, e) Representative (d) and quantification (e) of DiD positive cells out of total GL261 cells incubated with DiD-labeled EVs (500 ng) isolated from Raw264.7 Mφ and EMφ expressing shC and *shLdha* for 24 hrs. Scale bar, 200  $\mu\text{m}$ .  $n = 3$  independent samples. (f, g) Representative images (f) and quantification (g) of immunofluorescence for LDHA in GL261 cells incubated with EVs (500 ng) isolated from control Mφ, GL261 EMφ expressing shC or *shLdha* for 24 hrs. Scale bar, 200  $\mu\text{m}$ .  $n = 3$  independent samples. The experiments were independently repeated at least two to three times. Data from multiple replicates are presented as mean  $\pm$  SEM. Statistical analyses were determined by one-way ANOVA test (a, c, e, g). Source data are provided as a Source Data file.

Supplementary Information Fig. 11

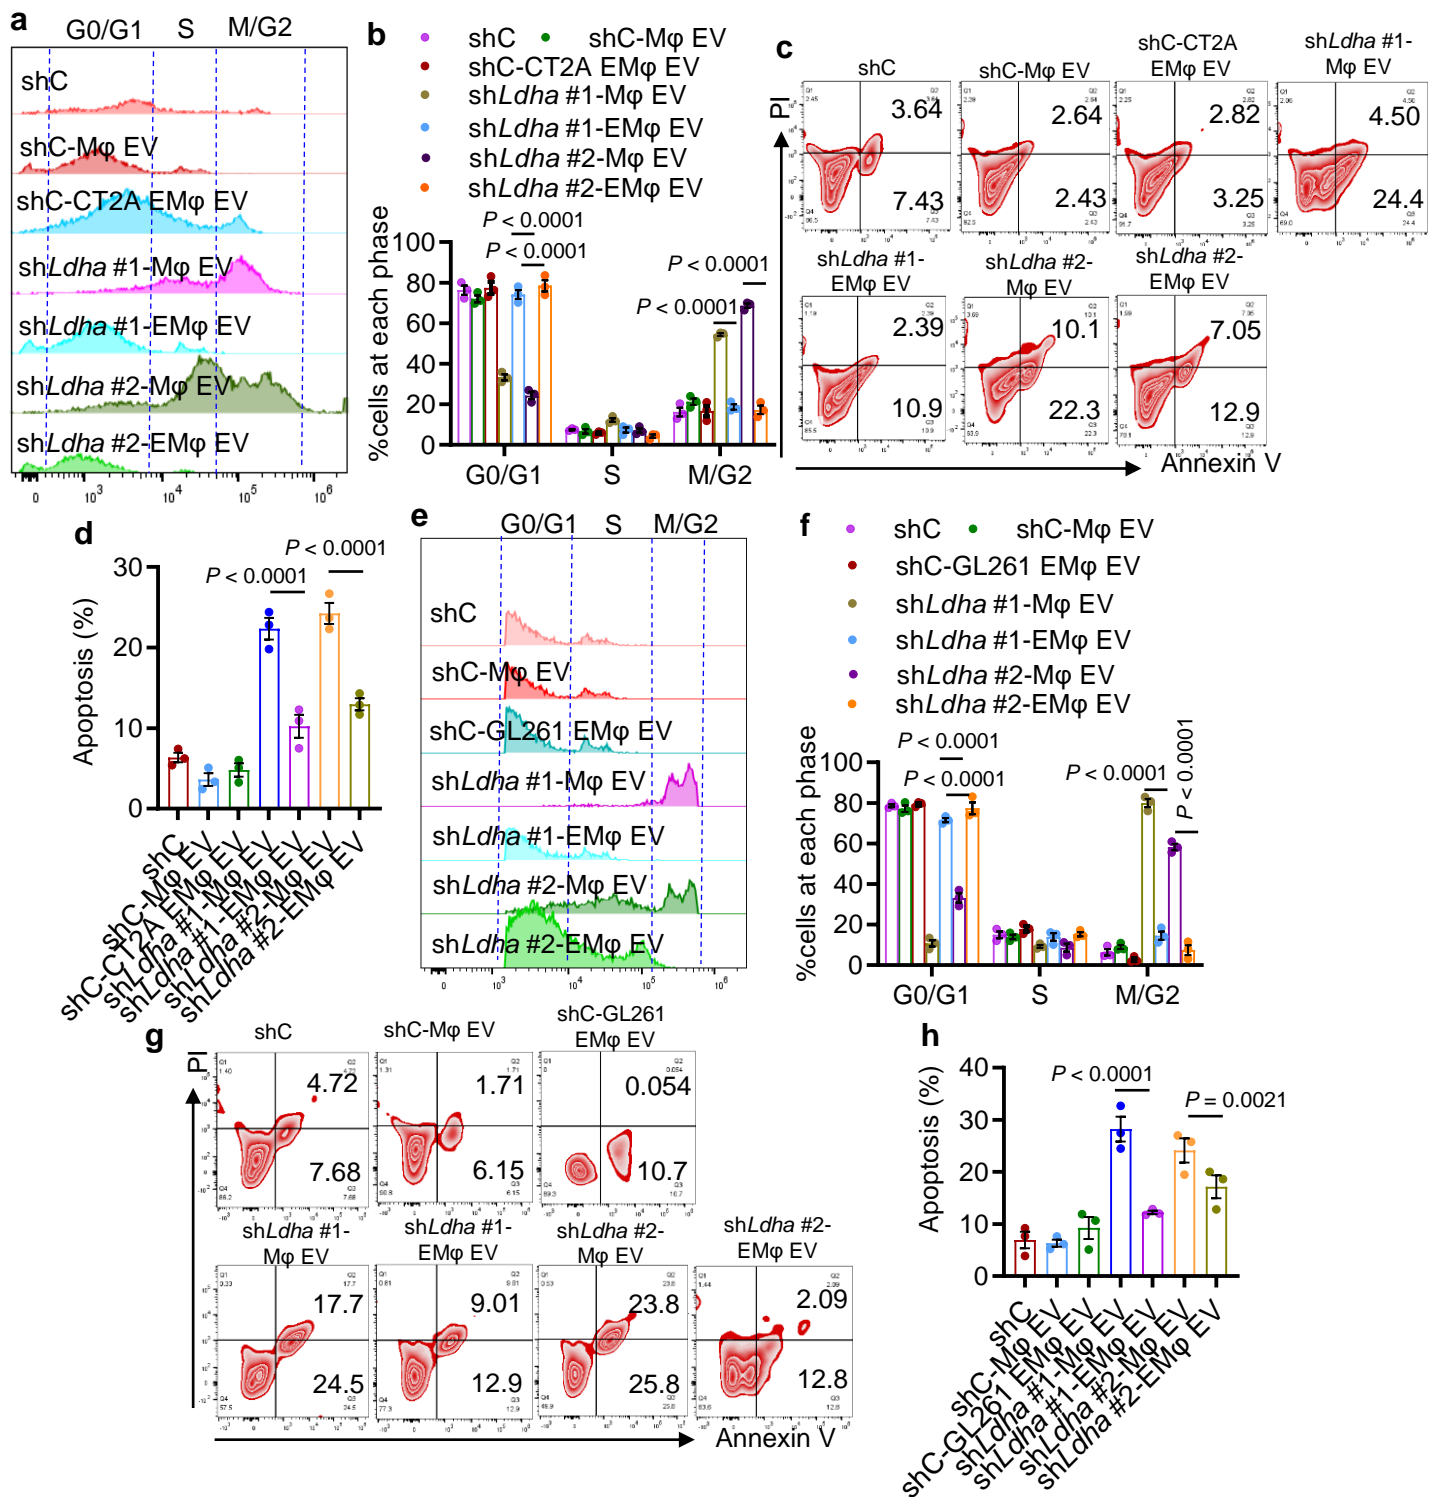

**Supplementary Fig. S11. TAM-derived EVs promote glioblastoma cell growth via LDHA.** (a, b) Representative (a) and quantification (b) of flow cytometry cell cycle analysis of shC and shLdha CT2A cells treated with EVs (500 ng) isolated from Raw264.7 macrophages and CT2A EMφ. n = 3 independent samples. (c, d) Representative (c) and quantification (d) of flow cytometry apoptosis analysis in shC and shLdha CT2A cells treated with EVs (500 ng) isolated from Raw264.7 Mφ and CT2A EMφ. n = 3 independent samples. (e, f) Representative (e) and quantification (f) of flow cytometry cell cycle analysis of shC and shLdha GL261 cells treated with EVs (500 ng) isolated from Raw264.7 Mφ and GL261 EMφ. n = 3 independent samples. (g, h) Representative (g) and quantification (h) of flow cytometry apoptosis analysis in shC and shLdha GL261 cells treated with EVs (500 ng) isolated from Raw264.7 Mφ and GL261 EMφ. n = 3 independent samples. The experiments were independently repeated at least three times. Data presented as mean ± SEM and were analysed by one-way ANOVA test (b, d, f, h). Source data are provided as a Source Data file.

Supplementary Information Fig. 12

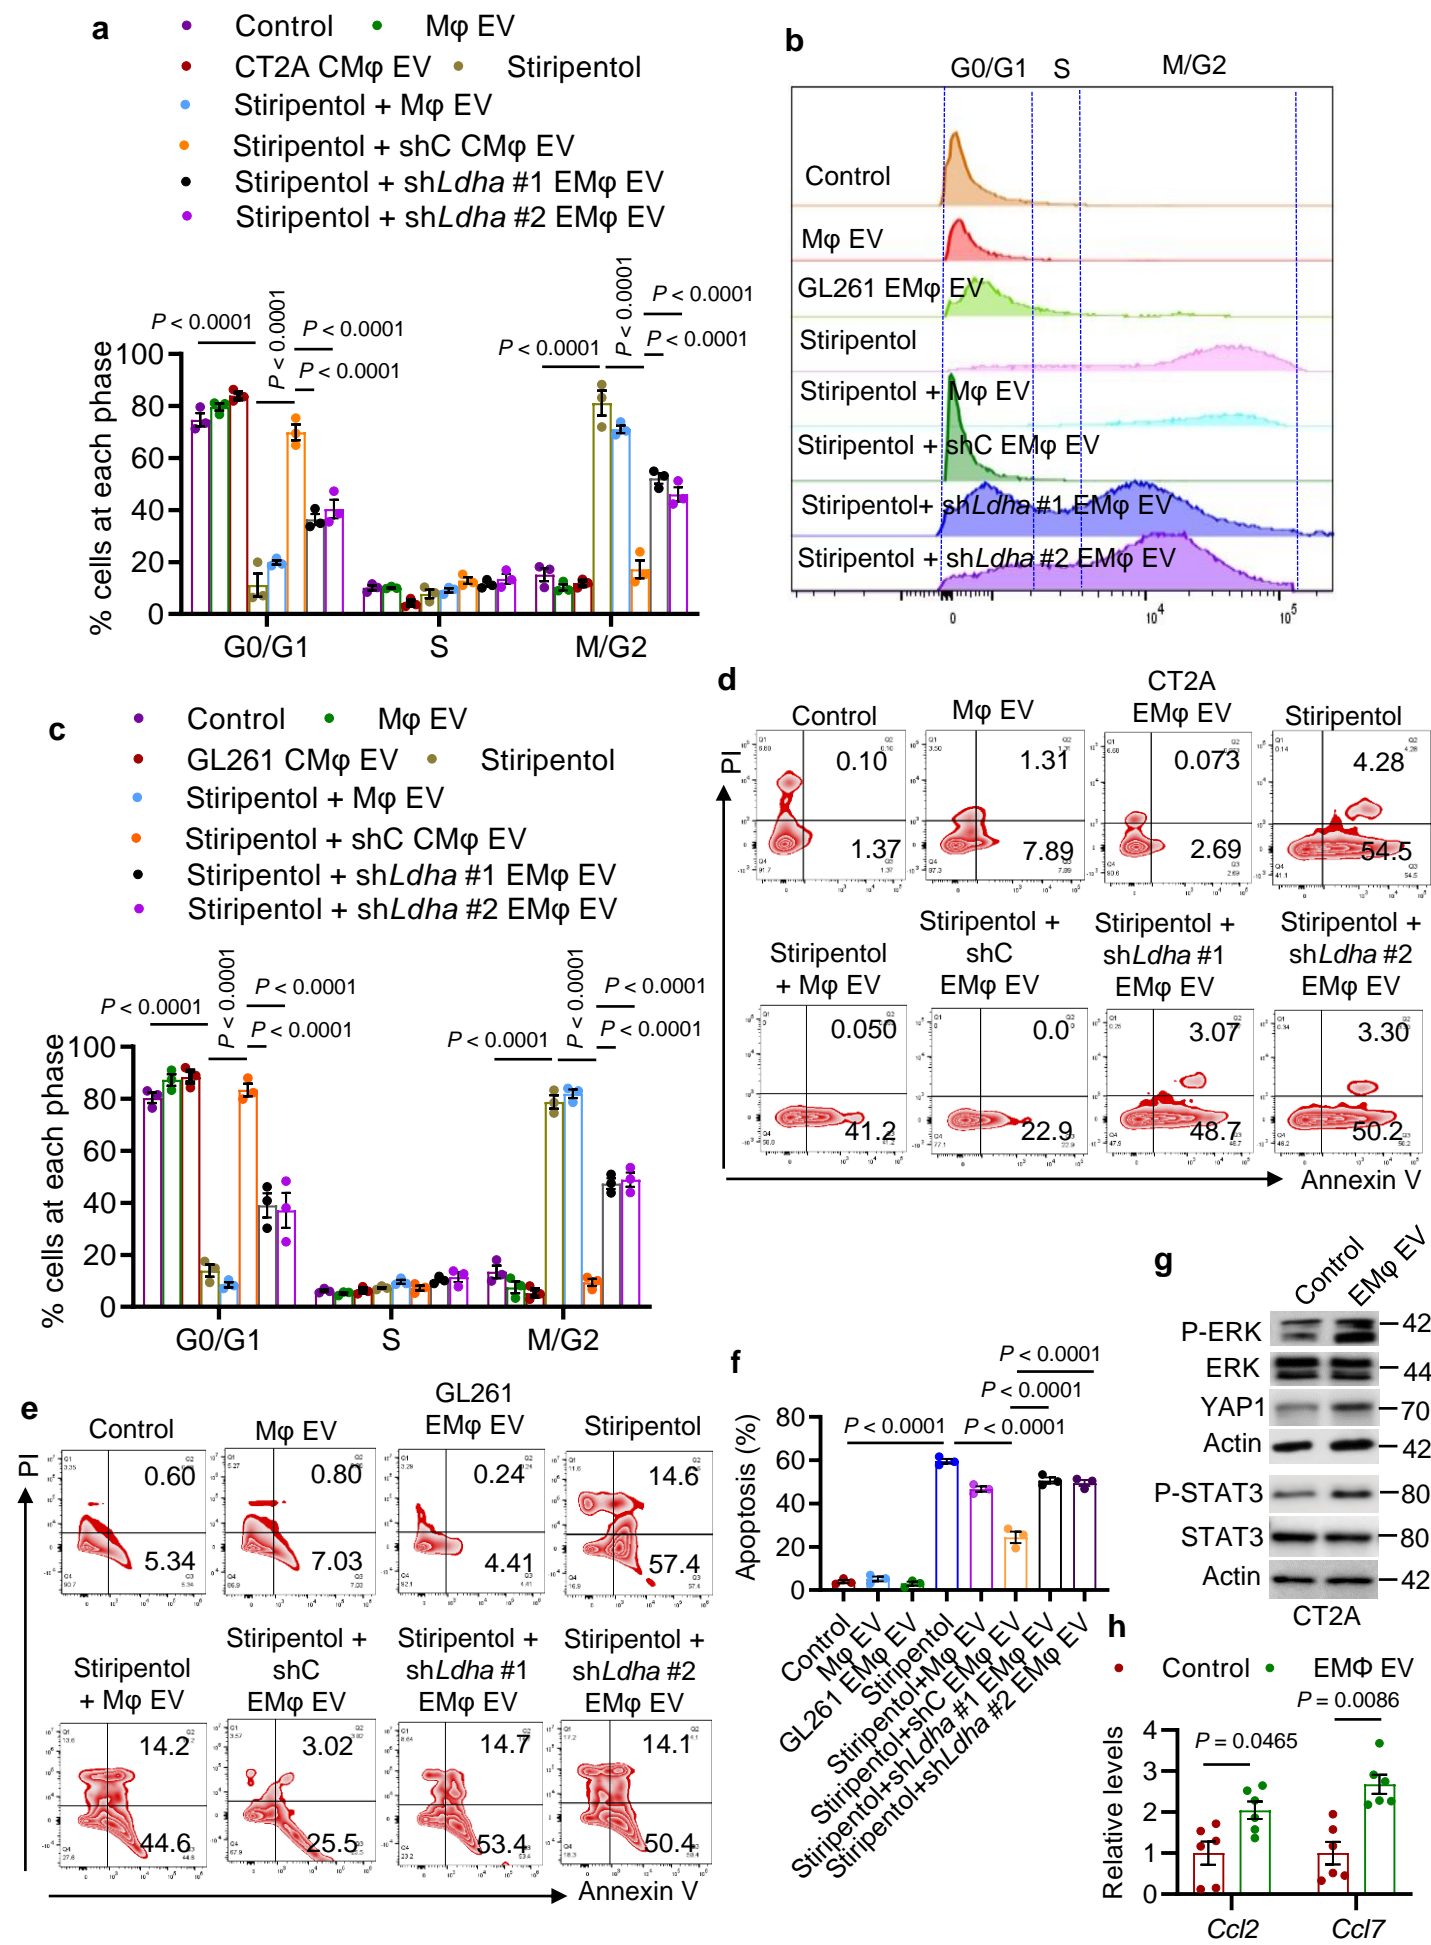

**Supplementary Fig. S12. Depletion of LDHA in macrophages impairs the pro-tumor effect of TAM-derived EVs.** (a) Quantification of flow cytometry cell cycle analysis of CT2A cells treated with extracellular vesicles (EVs, 500 ng) isolated from Raw264.7 macrophages (M $\phi$ ) and CT2A conditioned media-educated macrophages (EM $\phi$ ), or treated with stiripentol (10  $\mu$ M) in the presence or absence of EVs isolated from CT2A EM $\phi$  expressing shRNA control (shC) and *Ldha* shRNAs (sh*Ldha*). n = 3 independent samples. (b, c) Representative images (b) and quantification (c) of flow cytometry cell cycle analysis of GL261 cells treated with EVs (500 ng) isolated from Raw264.7 M $\phi$  and GL261EM $\phi$ , or treated with stiripentol (10  $\mu$ M) in the presence or absence of EVs isolated from GL261 EM $\phi$  expressing shC and sh*Ldha*. n = 3 independent samples. (d) Representative images of flow cytometry apoptosis analysis in CT2A cells treated with EVs (500 ng) isolated from Raw264.7 M $\phi$  and CT2A EM $\phi$ , or treated with stiripentol (10  $\mu$ M) in the presence or absence of EVs isolated from CT2A EM $\phi$  expressing shC and sh*Ldha*. (e, f) Representative images (e) and quantification (f) of flow cytometry apoptosis analysis in GL261 cells treated with EVs (500 ng) isolated from Raw264.7 M $\phi$  and GL261 EM $\phi$ , or treated with stiripentol (10  $\mu$ M) in the presence or absence of EVs isolated from GL261 EM $\phi$  expressing shC and sh*Ldha*. n = 3 independent samples. (g) Immunoblots of P-ERK, ERK, YAP1, P-STAT3, STAT3, and actin in CT2A cells treated with or without EVs (500 ng) isolated from CT2A EM $\phi$ . (h) RT-qPCR for *Ccl2* and *Ccl7* in CT2A cells treated with or without EVs (500 ng) isolated from CT2A EM $\phi$ . n = 6 independent samples. A representative example of five and three replicates is shown for (d) and (g), respectively. The experiments for (a-g) were independently repeated at least three times. Data presented as mean  $\pm$  SEM. Statistical analyses were determined by one-way ANOVA test (a, c, f, h). Source data are provided as a Source Data file.

# Supplementary Information Fig. 13

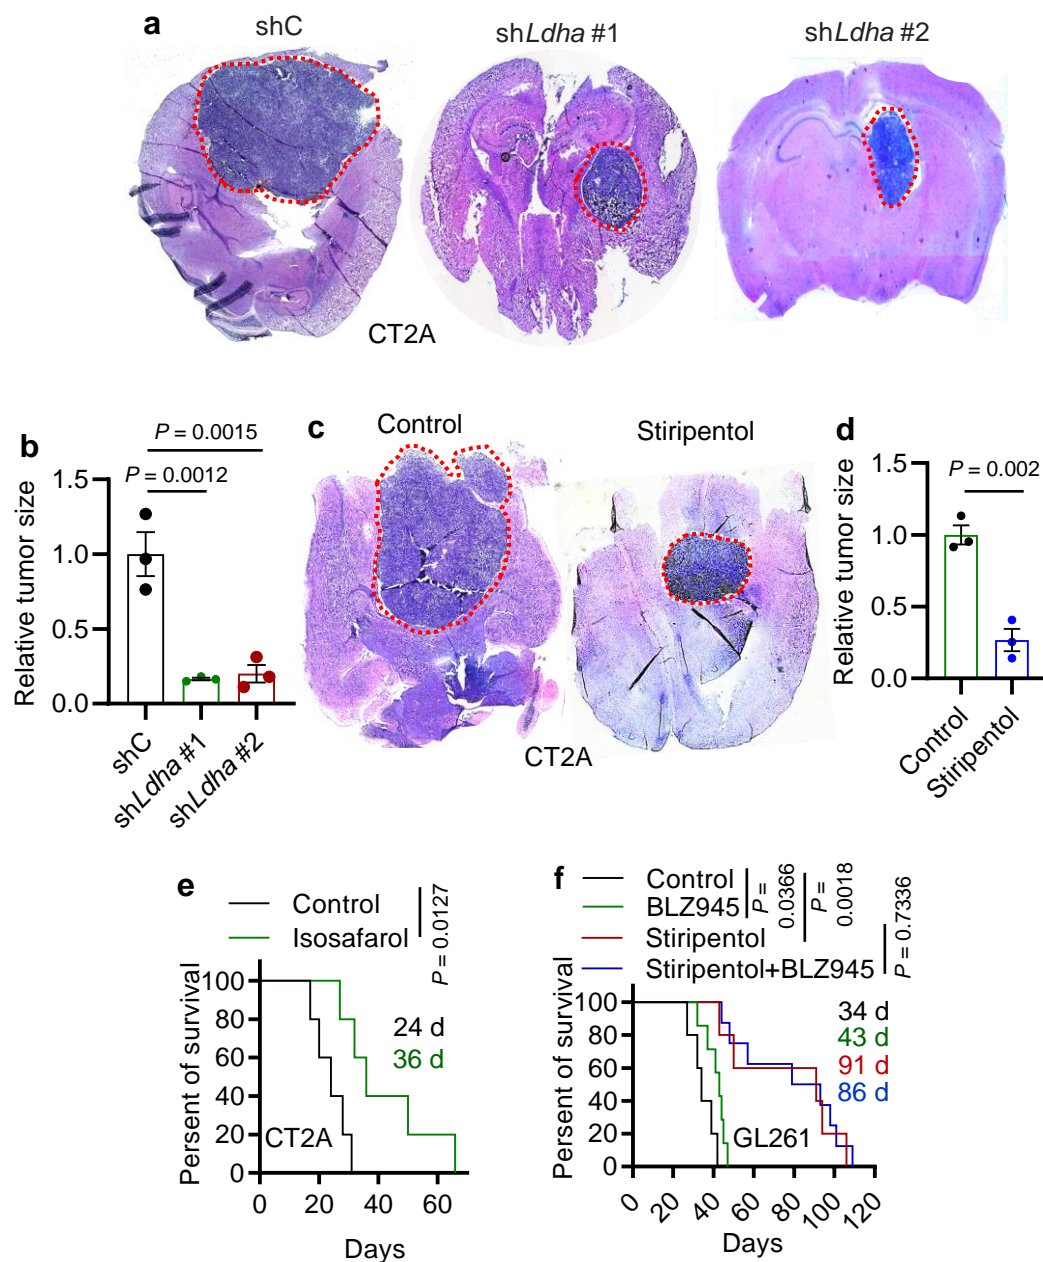

**Supplementary Fig. S13. LDHA inhibition reduces glioblastoma growth *in vivo*.** (a, b) Representative images (a) and quantification (b) of H&E staining for CT2A tumors expressing shRNA control (shC) and *Ldha* shRNAs (shLdha). Tumors were harvested when control mice showing neurologic deficits or moribund.  $n = 3$  independent samples. (c, d) Representative images (c) and quantification (d) of H&E staining for CT2A tumors treated with or without stiripentol (150 mg/kg, i.p., every other day for 6 doses). Tumors were harvested when control mice showing neurologic deficits or moribund.  $n = 3$  independent samples. (e) Survival curves of C57BL/6 mice implanted with CT2A ( $2 \times 10^4$  cells). Mice were treated with isosafarol (150 mg/kg, i.p., every other day, 6 doses) beginning at day 8 post-orthotopic injection. ( $n = 5$  mice per group, sharing the control group with Fig. 6c). (f) Survival curves of C57BL/6 mice implanted with GL261 cells ( $2 \times 10^4$  cells). Mice were treated with stiripentol (150 mg/kg, i.p., every other day, 6 doses) and BLZ945 (200 mg/kg, oral gavage, every other day, 5 doses) beginning at day 8 post-orthotopic injection.  $n = 5, 7, 5$  and 8 mice for control, BLZ945, stiripentol, and stiripentol + BLZ945 group, respectively. Data presented as mean  $\pm$  SEM. Statistical analyses were determined by one-way ANOVA test (b), Student's t-test (d), and log-rank test (e, f). Source data are provided as a Source Data file.

Supplementary Information Fig. 14

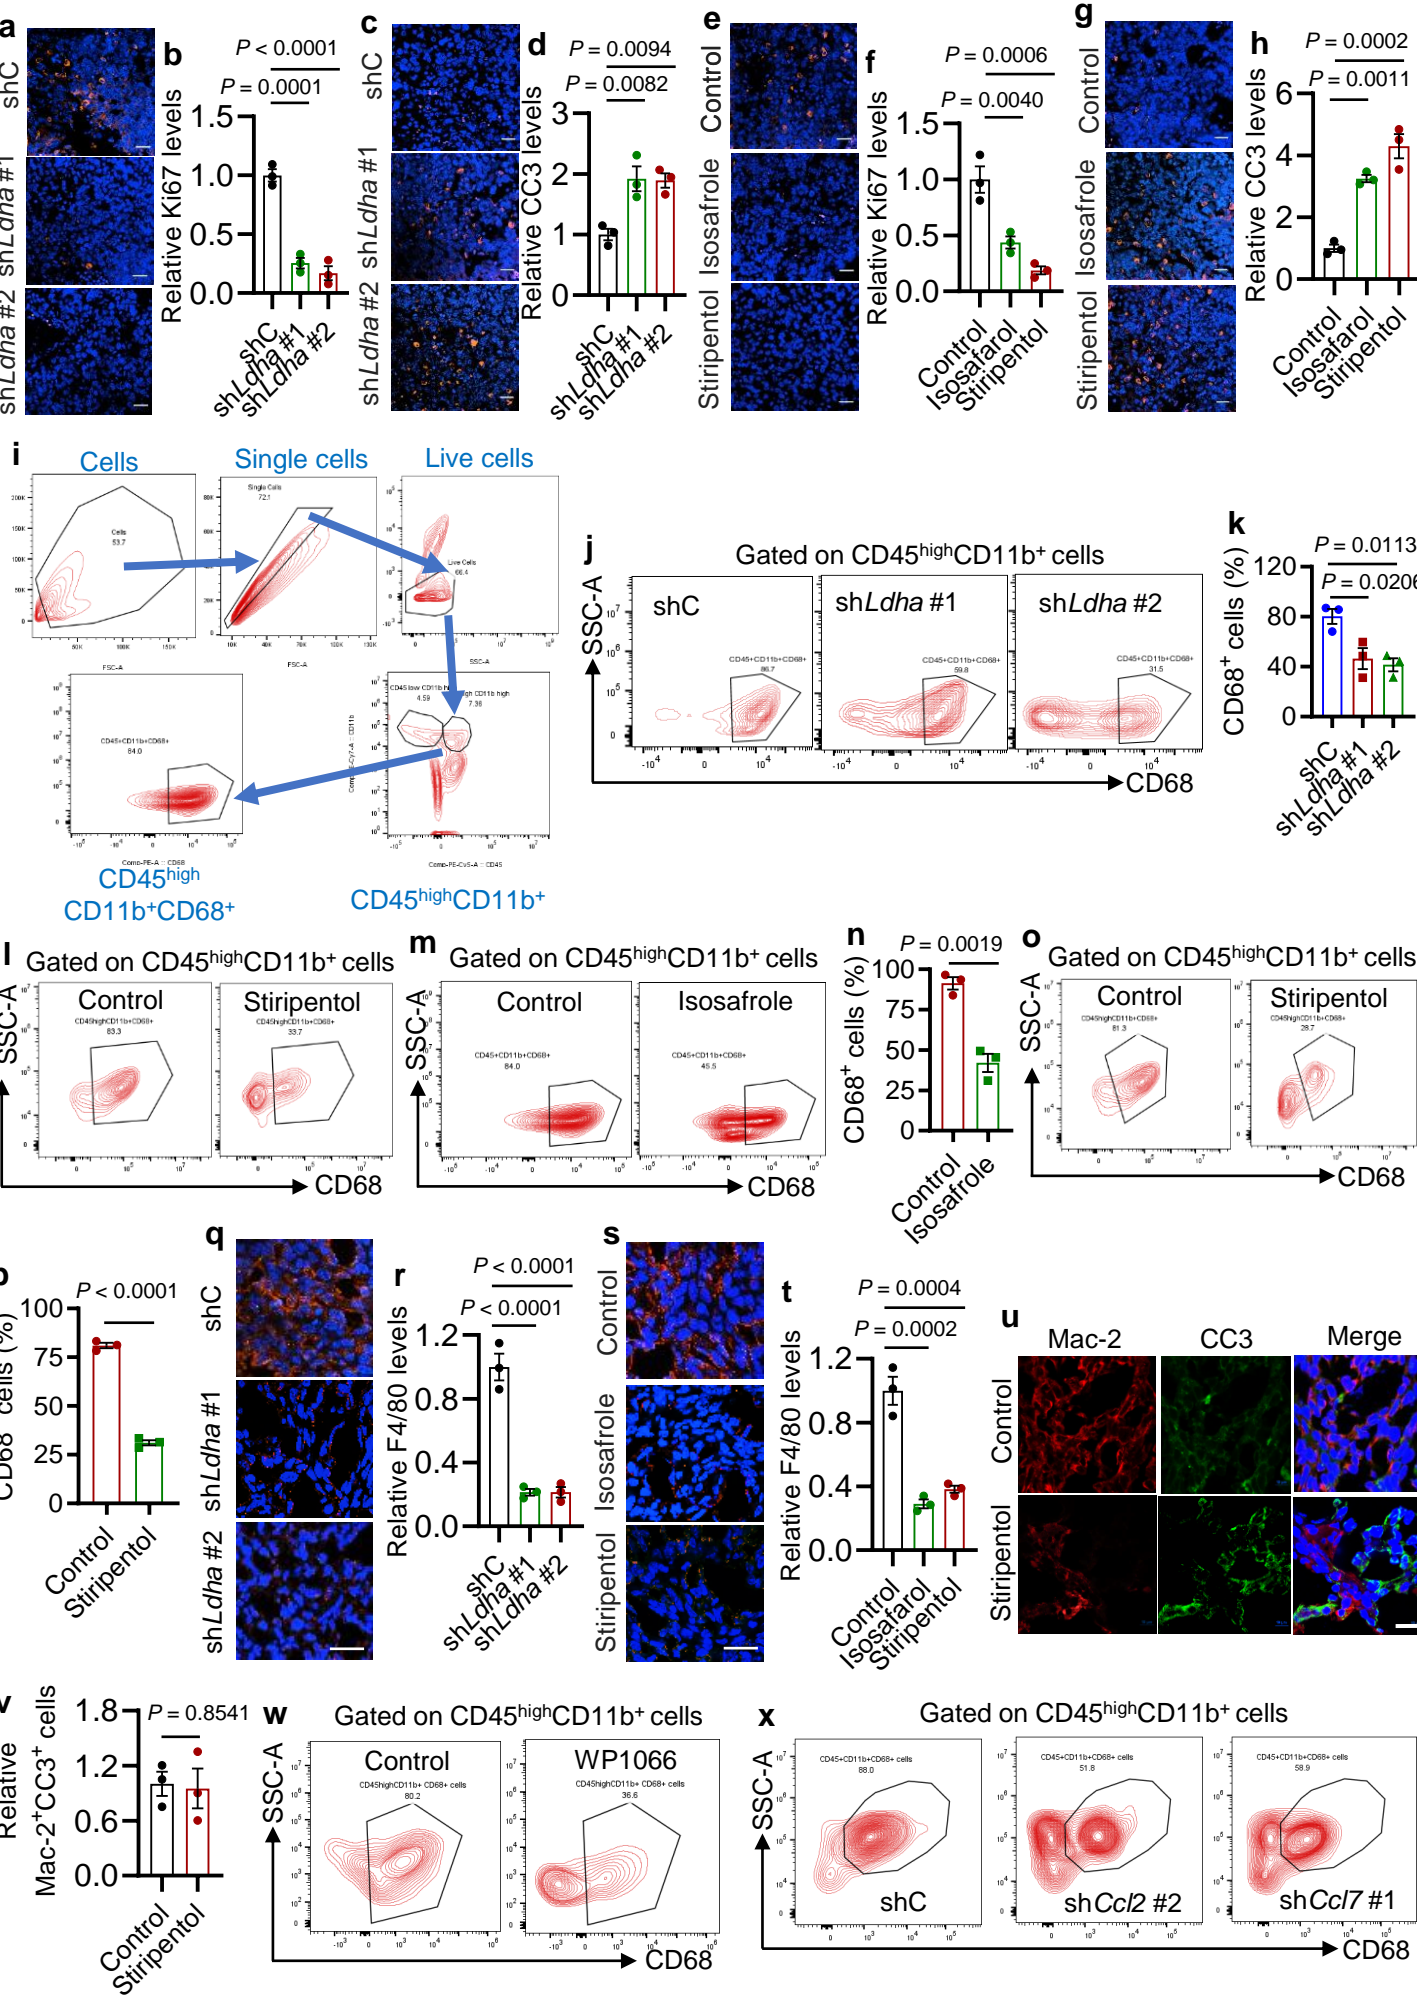

**Supplementary Fig. S14. Inhibition of the LDHA-STAT2-CCL2/CCL7 axis reduces glioblastoma cell proliferation and macrophage infiltration in glioblastoma mouse models.** (a, b) Immunofluorescence (a) and quantification (b) of Ki67 positive cells in CT2A tumors expressing shRNA control (shC) and *Ldha* shRNAs (sh*Ldha*). Scale bar, 50  $\mu$ m. n = 3 independent samples. (c, d) Immunofluorescence (c) and quantification (d) of cleaved caspase 3 (CC3) positive cells in CT2A tumors expressing shC and sh*Ldha*. Scale bar, 50  $\mu$ m. n = 3 independent samples. (e, f) Immunofluorescence (e) and quantification (f) of Ki67 positive cells in CT2A tumors treated with or without stiripentol and isosafrole. Scale bar, 50  $\mu$ m. n = 3 independent samples. (g, h) Immunofluorescence (g) and quantification (h) of CC3 positive cells in CT2A tumors treated with or without stiripentol and isosafrole. Scale bar, 50  $\mu$ m. n = 3 independent samples. (i) Flow cytometry gating strategy for intratumoral CD45<sup>high</sup>CD11b<sup>+</sup>CD68<sup>+</sup> macrophages. (j, k) Representative (j) and quantification (k) of flow cytometry analysis for the percentage of CD68<sup>+</sup> macrophages out of CD45<sup>high</sup>CD11b<sup>+</sup> cells in CT2A tumors expressing shC and sh*Ldha*. n = 3 independent samples. (l) Representative of flow cytometry analysis for the percentage of CD68<sup>+</sup> macrophages out of CD45<sup>high</sup>CD11b<sup>+</sup> cells in CT2A tumors treated with or without stiripentol. (m, n) Representative (m) and quantification (n) of flow cytometry analysis for the percentage of CD68<sup>+</sup> macrophages out of CD45<sup>high</sup>CD11b<sup>+</sup> cells in CT2A tumors treated with or without isosafrole. n = 3 independent samples. (o, p) Representative (o) and quantification (p) of flow cytometry analysis for the percentage of CD68<sup>+</sup> macrophages out of CD45<sup>high</sup>CD11b<sup>+</sup> cells in 005 GSC tumors treated with or without stiripentol. n = 3 independent samples. (q, r) Immunofluorescence (q) and quantification (r) of F4/80 positive cells in CT2A tumors expressing shC and sh*Ldha*. Scale bar, 50  $\mu$ m. n = 3 independent samples. (s, t) Immunofluorescence (s) and quantification (t) of F4/80 positive cells in CT2A tumors treated with or without stiripentol and isosafrole. Scale bar, 50  $\mu$ m. n = 3 independent samples. (u, v) Immunofluorescence (u) and quantification (v) of Mac-2 (macrophage marker) and cleaved caspase 3 (CC3) positive cells in CT2A tumors treated with or without stiripentol. Scale bar, 20  $\mu$ m. n = 3 independent samples. (w) Representative of flow cytometry analysis for the percentage of CD68<sup>+</sup> macrophages out of CD45<sup>high</sup>CD11b<sup>+</sup> cells in CT2A tumors treated with or without WP1066. (x) Representative of flow cytometry analysis for the percentage of CD68<sup>+</sup> macrophages out of CD45<sup>high</sup>CD11b<sup>+</sup> cells in shC, sh*Ccl2*, and sh*Ccl7* CT2A tumors. A representative example of three replicates is shown for (l, w, and x). The immunofluorescence experiments were independently repeated at least two to three times. Data presented as mean  $\pm$  SEM. Statistical analyses were determined by one-way ANOVA test (b, d, f, h, k, r, t) and Student's t-test (n, p, v). Source data are provided as a Source Data file.

# Supplementary Information Fig. 15

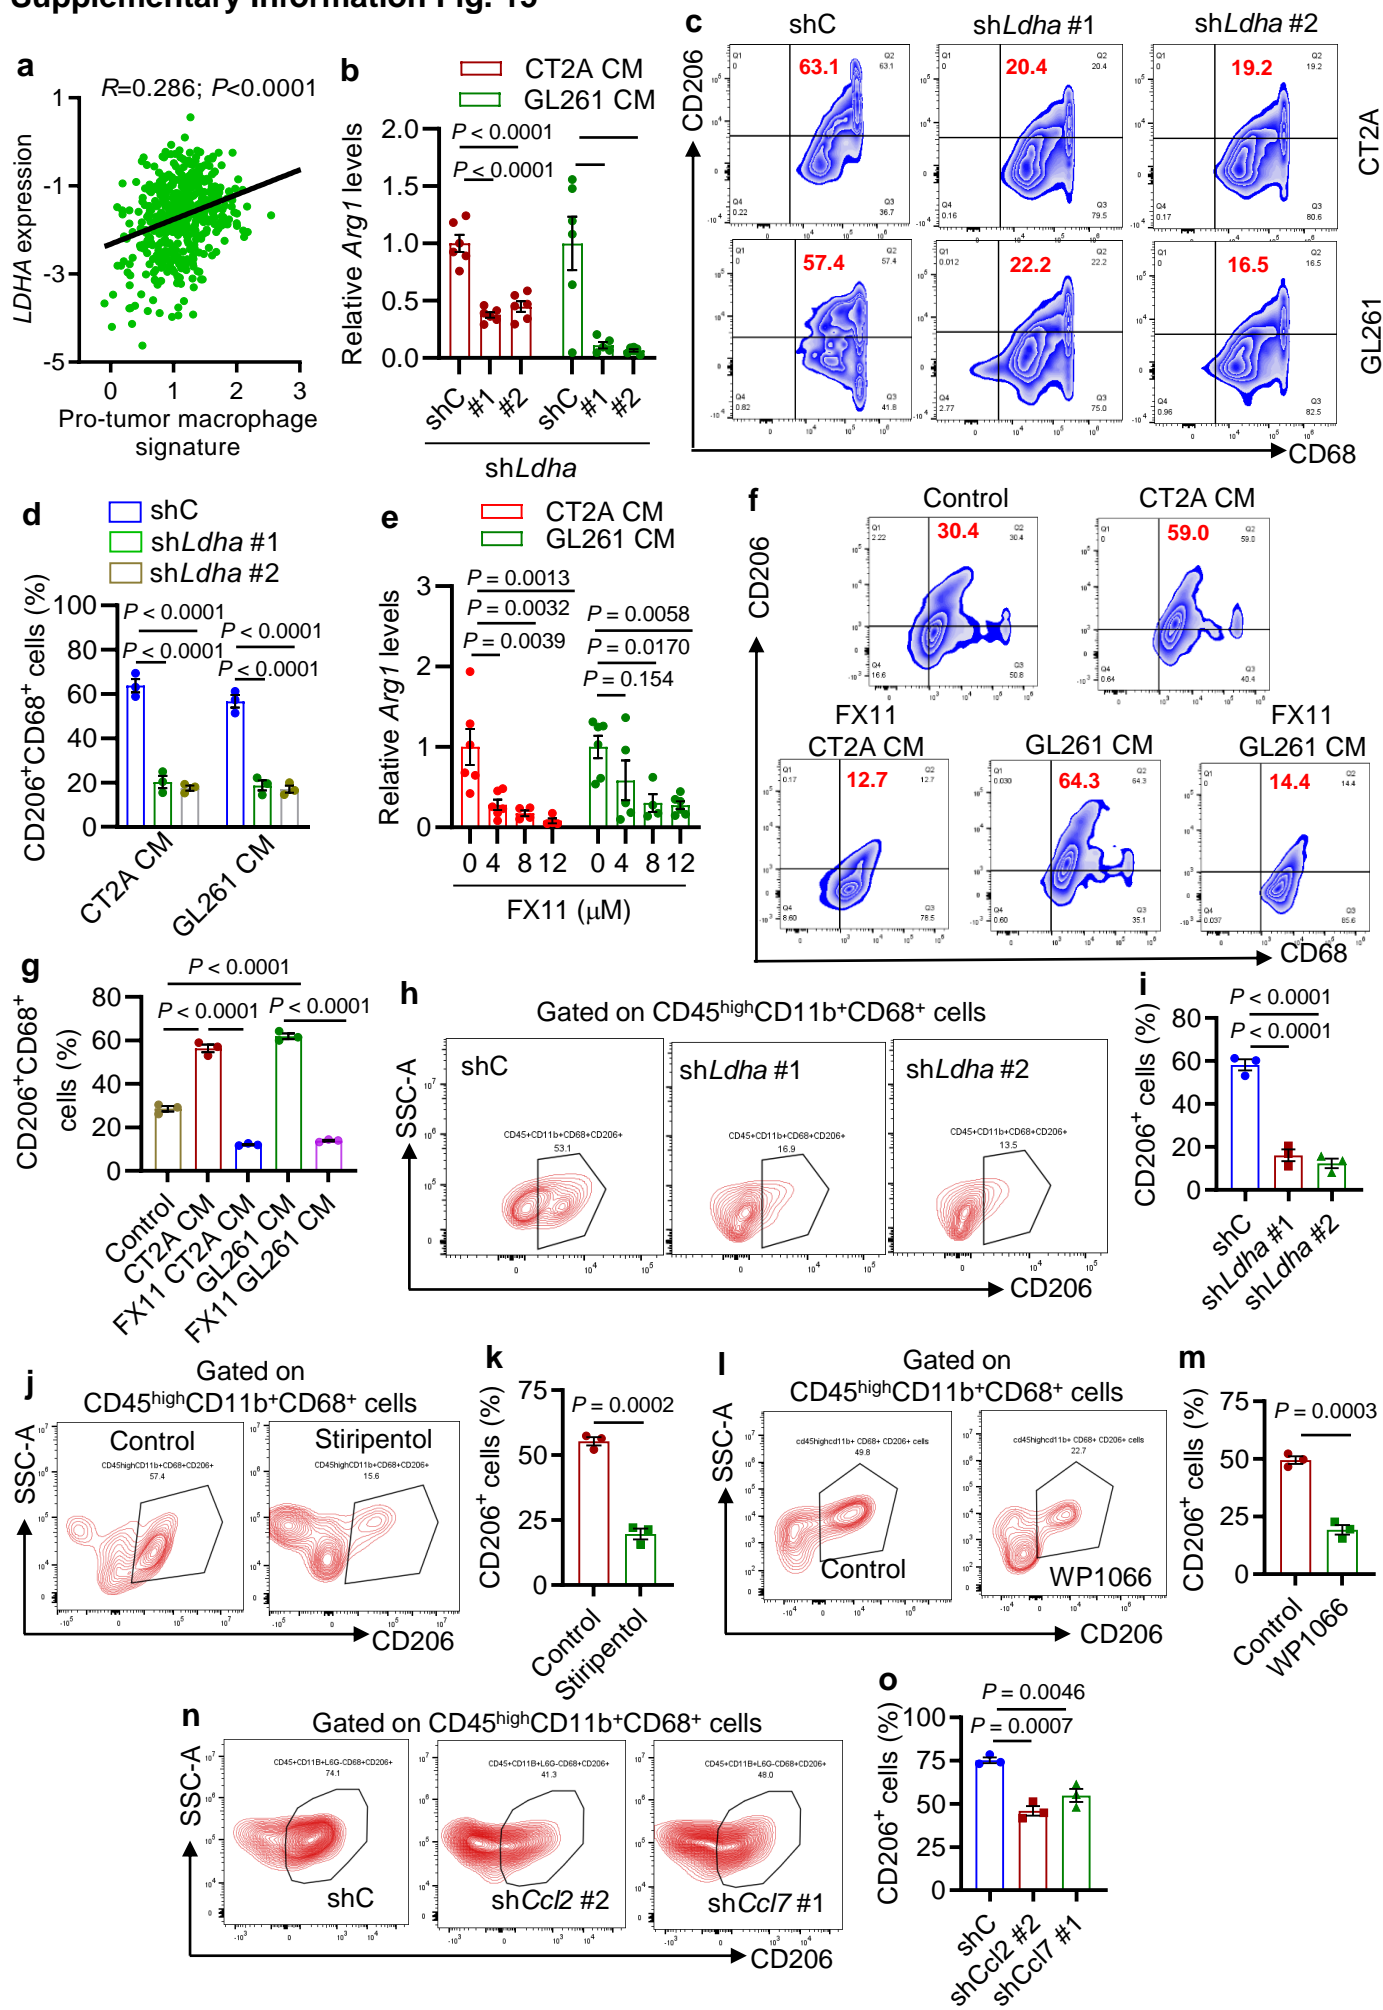

**Supplementary Fig. S15. Glioblastoma cell LDHA-YAP1/STAT3-CCL2/CCL7 axis promotes macrophage pro-tumor polarization.** (a) The correlation analysis between *LDHA* expression and pro-tumor macrophage signature in TCGA glioblastoma dataset. The pro-tumor macrophage signature was determined by a set of genes as reported previously<sup>32</sup>. *R* and *P* values are shown. (b) RT-qPCR for *Arg1* in Raw264.7 macrophages following the treated with or without the conditional media (CM) from CT2A and GL261 cells expressing shRNA control (shC) and *Ldha* shRNAs (sh*Ldha*). *n* = 6 independent samples. (c, d) Representative (c) and quantification (d) of flow cytometry analysis for the percentage of CD68<sup>+</sup>CD206<sup>+</sup> cells in Raw264.7 macrophages treated with or without CM from CT2A and GL261 cells expressing shC and sh*Ldha*. *n* = 3 independent samples. (e) RT-qPCR for *Arg1* in Raw264.7 macrophages following the treatment with or without the CM from FX11-treated CT2A and GL261 cells. *n* = 6 independent samples. (f, g) Representative (f) and quantification (g) of flow cytometry analysis for the percentage of CD68<sup>+</sup>CD206<sup>+</sup> cells in Raw264.7 macrophages following the treatment with or without the CM from FX11-treated CT2A and GL261 cells. *n* = 3 independent samples. (h, i) Representative (h) and quantification (i) of flow cytometry analysis for the percentage of CD206<sup>+</sup> pro-tumor macrophages out of CD45<sup>high</sup>CD11b<sup>+</sup>CD68<sup>+</sup> macrophages in CT2A tumors expressing shC and sh*Ldha*. *n* = 3 independent samples. (j, k) Representative (j) and quantification (k) of flow cytometry analysis for the percentage of CD206<sup>+</sup> pro-tumor macrophages out of CD45<sup>high</sup>CD11b<sup>+</sup>CD68<sup>+</sup> macrophages in CT2A tumors treated with or without stiripentol. *n* = 3 independent samples. (l, m) Representative (l) and quantification (m) of flow cytometry analysis for the percentage of CD206<sup>+</sup> pro-tumor macrophages out of CD45<sup>high</sup>CD11b<sup>+</sup>CD68<sup>+</sup> macrophages in CT2A tumors treated with or without STAT3 inhibitor WP1066. *n* = 3 independent samples. (n, o) Representative (n) and quantification (o) of flow cytometry analysis for the percentage of CD206<sup>+</sup> pro-tumor macrophages out of CD45<sup>high</sup>CD11b<sup>+</sup>CD68<sup>+</sup> macrophages in CT2A tumors expressing shC, sh*Ccl2* and sh*Ccl7*. *n* = 3 independent samples. The experiments for (b-g) were independently repeated at least two times. Data presented as mean  $\pm$  SEM. Statistical analyses were determined by one-way ANOVA test (b, d, e, g, i, o) and Student's t-test (k, m). Source data are provided as a Source Data file.

Supplementary Information Fig. 16

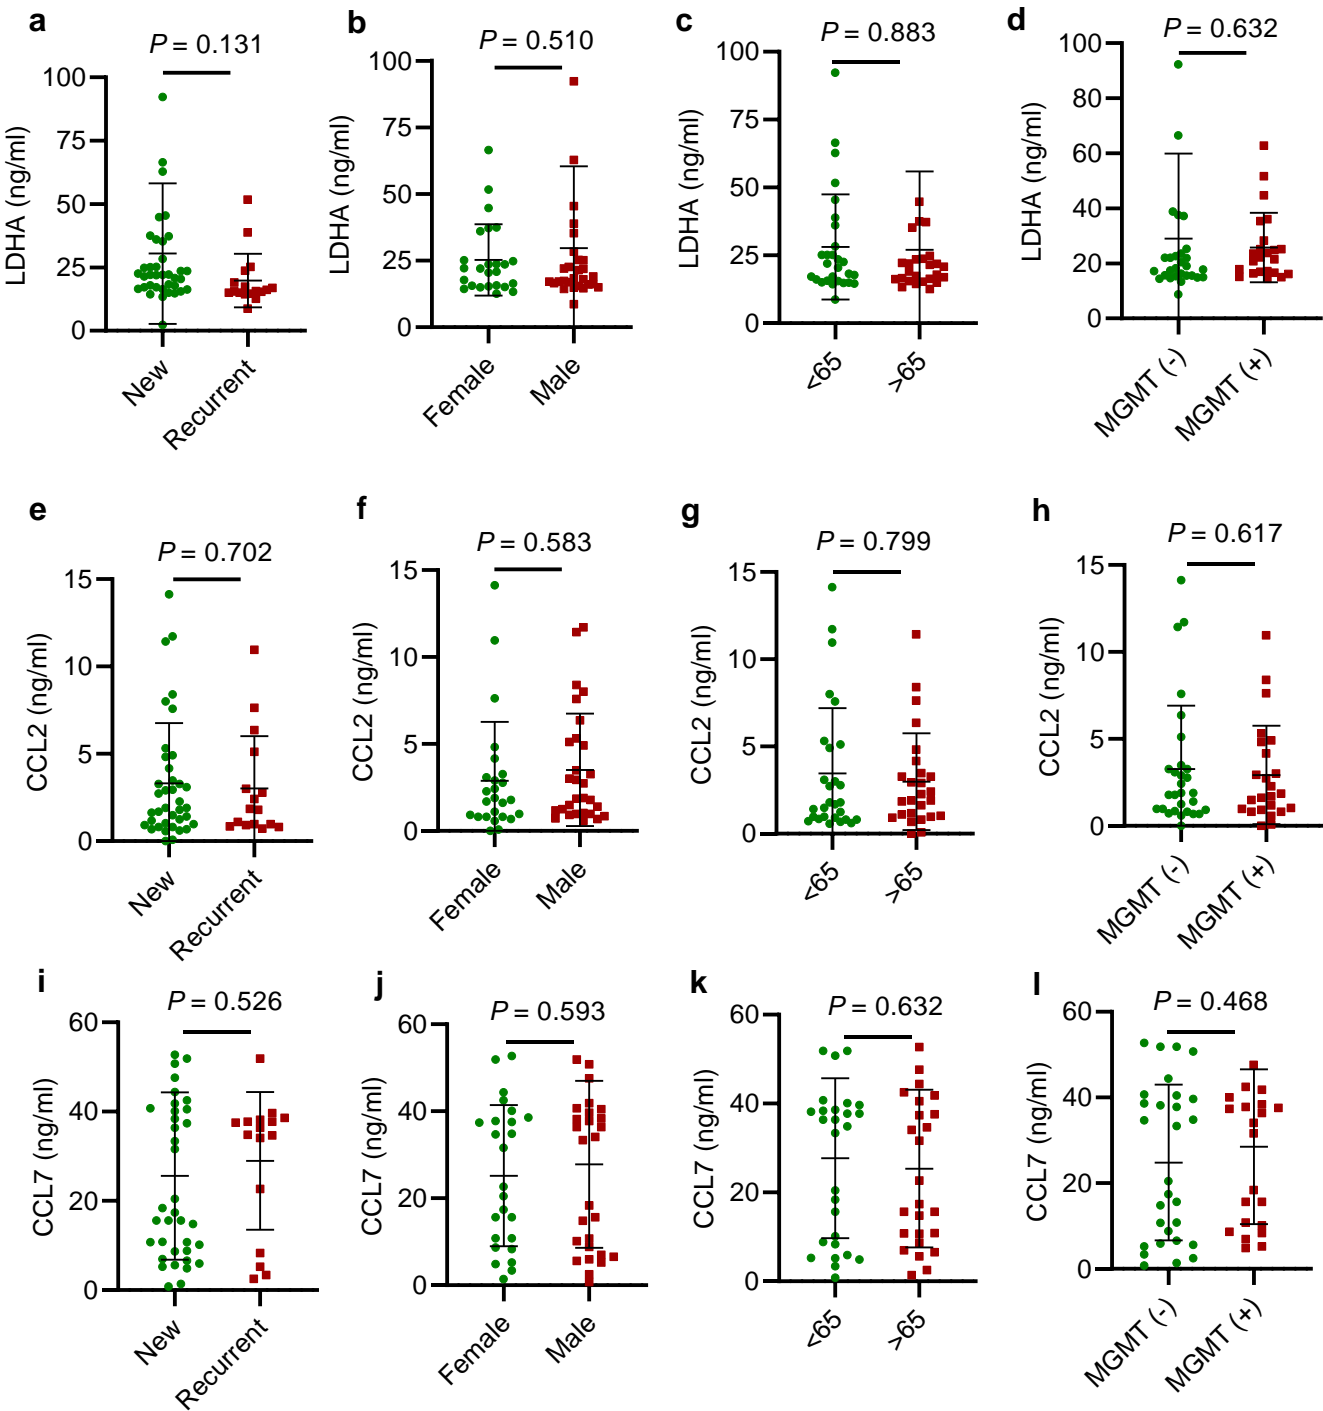

**m**

|                              | Healthy control     | Glioblastoma       | <i>P</i> value |
|------------------------------|---------------------|--------------------|----------------|
| Size (nm)                    | 164.6 ± 3.8         | 157.76 ± 2.7       | 0.6020         |
| Concentration (particles/ml) | 4.55E+08 ± 1.81E+06 | 3.06E+08 ± 7.5E+06 | 0.8107         |

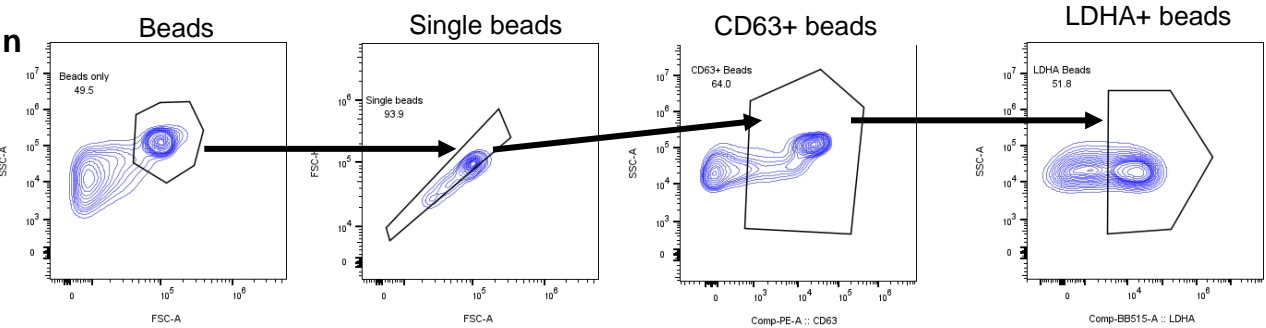

**Supplementary Fig. S16. Plasma LDHA, CCL2 and CCL7 levels do not relate to glioblastoma patient recurrence, gender, age and MGMT methylation. (a-d)** The level of plasma LDHA from newly diagnosed and recurrent (a), female and male (b), age <65 and ≥ 65 (c), and MGMT unmethylated and methylated (d) glioblastoma patients. **(e-h)** The level of plasma CCL2 from newly diagnosed and recurrent (e), female and male (f), age <65 and ≥ 65 (g), and MGMT unmethylated and methylated (h) glioblastoma patients. **(i-l)** The level of plasma CCL7 from newly diagnosed and recurrent (i), female and male (j), age <65 and ≥ 65 (k), and MGMT unmethylated and methylated (l) glioblastoma patients. **(m)** Quantification of average diameter and concentration of extracellular vesicles (EVs) isolated from the plasma of healthy control and glioblastoma patients based on nanoparticle tracking analysis. n = 3 independent samples and the experiments were independently repeated at least three times. **(n)** Gating strategy for examining LDHA level in CD63<sup>+</sup> EVs isolated from the plasma of healthy control and glioblastoma patients. Data presented as mean ± SD and analysed by Student's t-test (a-m). Source data are provided as a Source Data file.

## Supplementary Information

**Table S1. Computational analysis demonstrates a key role of tumor metabolism in regulation of myeloid/leukocyte migration, immune response, and cytokine/chemokine in TCGA GBM patient tumors.**

| Top ten enriched pathways in metabolism-high patients | Gene Ontology Biological Process | Hallmark pathways         | KEGG Pathways                          |
|-------------------------------------------------------|----------------------------------|---------------------------|----------------------------------------|
| #1                                                    | LEUKOCYTE_CHEMOTAXIS             | EMT                       | CYTOKINE_CYTOKINE_RECEPTOR_INTERACTION |
| #2                                                    | CELL_CHEMOTAXIS                  | TNFA_SIGNALING_VIA_NFKB   | FOCAL_ADHESION                         |
| #3                                                    | LEUKOCYTE_MIGRATION              | INFLAMMATORY_RESPONSE     | LYSOSOME                               |
| #4                                                    | MYELOID_LEUKOCYTE_MIGRATION      | INTERFERON_GAMMA_RESPONSE | ECM_RECEPTOR_INTERACTION               |
| #5                                                    | MYELOID_LEUKOCYTE_ACTIVATION     | KRAS_SIGNALING_UP         | CHEMOKINE_SIGNALING_PATHWAY            |
| #6                                                    | GRANULOCYTE_MIGRATION            | IL6_JAK_STAT3_SIGNALING   | NOD_LIKE_RECEPTOR_SIGNALING_PATHWAY    |
| #7                                                    | GRANULOCYTE_CHEMOTAXIS           | INTERFERON_ALPHA_RESPONSE | LEISHMANIA_INFECTION                   |
| #8                                                    | NEUTROPHIL_MIGRATION             | IL2_STAT5_SIGNALING       | CELL_ADHESION_MOLECULES_CAMS           |
| #9                                                    | NEUTROPHIL_CHEMOTAXIS            | COMPLEMENT                | COMPLEMENT_AND_COAGULATION_CASCADES    |
| #10                                                   | INTERLEUKIN_6_PRODUCTION         | HYPOXIA                   | TOLL_LIKE_RECEPTOR_SIGNALING_PATHWAY   |

**Table S2. Compound library information.**

| Product Name     | Cat. No. | CAS No.     | M.Wt   | Target                                                                | Formula                                                         | Clinical Information    |
|------------------|----------|-------------|--------|-----------------------------------------------------------------------|-----------------------------------------------------------------|-------------------------|
| D-Cycloserine    | HY-B0030 | 68-41-7     | 102.09 | Antibiotic; Bacterial; iGluR                                          | C <sub>3</sub> H <sub>6</sub> N <sub>2</sub> O <sub>2</sub>     | Launched                |
| Oseltamivir acid | HY-13318 | 187227-45-8 | 284.35 | Drug Metabolite; Influenza Virus                                      | C <sub>14</sub> H <sub>24</sub> N <sub>2</sub> O <sub>4</sub>   | Launched                |
| Emtricitabine    | HY-17427 | 143491-57-0 | 247.25 | Endogenous Metabolite; HIV; Reverse Transcriptase                     | C <sub>8</sub> H <sub>10</sub> FN <sub>3</sub> O <sub>3</sub> S | Launched                |
| Rolipram         | HY-16900 | 61413-54-5  | 275.34 | Bacterial; HIV; Phosphodiesterase (PDE)                               | C <sub>16</sub> H <sub>21</sub> NO <sub>3</sub>                 | Phase 2                 |
| Lopinavir        | HY-14588 | 192725-17-0 | 628.8  | HIV; HIV Protease; SARS-CoV                                           | C <sub>37</sub> H <sub>48</sub> N <sub>4</sub> O <sub>5</sub>   | Launched                |
| Amprenavir       | HY-17430 | 161814-49-9 | 505.63 | HIV; HIV Protease; SARS-CoV                                           | C <sub>25</sub> H <sub>35</sub> N <sub>3</sub> O <sub>6</sub> S | Launched                |
| Ofloxacin        | HY-B0125 | 82419-36-1  | 361.37 | Antibiotic; Bacterial; Endogenous Metabolite                          | C <sub>18</sub> H <sub>20</sub> FN <sub>3</sub> O <sub>4</sub>  | Launched                |
| Necrostatin-1    | HY-15760 | 4311-88-0   | 259.33 | Autophagy; Ferroptosis; Indoleamine 2,3-Dioxygenase (IDO); RIP kinase | C <sub>13</sub> H <sub>13</sub> N <sub>3</sub> O <sub>5</sub>   | No Development Reported |

|                                       |           |              |        |                                                                    |                  |                         |
|---------------------------------------|-----------|--------------|--------|--------------------------------------------------------------------|------------------|-------------------------|
| Atorvastatin (hemicalcium salt)       | HY-17379  | 134523-03-8  | 577.67 | Autophagy; Ferroptosis; HMG-CoA Reductase (HMGCR)                  | C33H34Ca0.5FN2O5 | Launched                |
| Oxybenzone                            | HY-A0067  | 131-57-7     | 228.24 | Apoptosis; Autophagy; RAR/RXR                                      | C14H12O3         | Launched                |
| 5-Aminolevulinic acid (hydrochloride) | HY-N0305  | 9/2/5451     | 167.59 | Apoptosis; Autophagy; Endogenous Metabolite; Mitophagy             | C5H10CINO3       | Launched                |
| Lovastatin                            | HY-N0504  | 75330-75-5   | 404.54 | Autophagy; Ferroptosis; HMG-CoA Reductase (HMGCR)                  | C24H36O5         | Launched                |
| VER-155008                            | HY-10941  | 1134156-31-2 | 556.4  | Autophagy; HSP                                                     | C25H23Cl2N7O4    | No Development Reported |
| 6-Mercaptopurine                      | HY-13677  | 50-44-2      | 152.18 | Autophagy; Endogenous Metabolite; Nucleoside Antimetabolite/Analog | C5H4N4S          | Launched                |
| Retinoic acid                         | HY-14649  | 302-79-4     | 300.44 | Autophagy; Endogenous Metabolite; PPAR; RAR/RXR                    | C20H28O2         | Launched                |
| Tarenflurbil                          | HY-10291  | 51543-40-9   | 244.26 | Autophagy; RAR/RXR                                                 | C15H13FO2        | Phase 3                 |
| Acetazolamide                         | HY-B0782  | 59-66-5      | 222.25 | Autophagy; Carbonic Anhydrase                                      | C4H6N4O3S2       | Launched                |
| Nortriptyline (hydrochloride)         | HY-B1417  | 894-71-3     | 299.84 | Autophagy; Drug Metabolite                                         | C19H22ClN        | Launched                |
| URB-597                               | HY-10864  | 546141-08-6  | 338.4  | Autophagy; FAAH; Mitophagy                                         | C20H22N2O3       | No Development Reported |
| Rutin                                 | HY-N0148  | 153-18-4     | 610.52 | Amyloid- $\beta$ ; Autophagy; Endogenous Metabolite                | C27H30O16        | Launched                |
| BAY 73-6691                           | HY-104028 | 794568-92-6  | 356.73 | Phosphodiesterase (PDE)                                            | C15H12ClF3N4O    | No Development Reported |
| PCC0208009                            | HY-100771 | 1668565-74-9 | 497.63 | Indoleamine 2,3-Dioxygenase (IDO)                                  | C29H35N7O        | No Development Reported |
| Vorasidenib                           | HY-104042 | 1644545-52-7 | 414.74 | Isocitrate Dehydrogenase (IDH)                                     | C14H13ClF6N6     | Phase 3                 |
| PF-05085727                           | HY-102050 | 1415637-72-7 | 413.4  | Phosphodiesterase (PDE)                                            | C20H18F3N7       | No Development Reported |
| LXR-623                               | HY-10629  | 875787-07-8  | 422.78 | LXR                                                                | C21H12ClF5N2     | Phase 1                 |
| IDO1-IN-5                             | HY-111540 | 2166616-75-5 | 396.45 | Indoleamine 2,3-Dioxygenase (IDO)                                  | C23H25FN2O3      | No Development Reported |
| IDH889                                | HY-112289 | 1429179-07-6 | 436.48 | Isocitrate Dehydrogenase (IDH)                                     | C23H25FN6O2      | No Development Reported |
| IOX4                                  | HY-120110 | 1154097-71-8 | 328.33 | HIF/HIF Prolyl-Hydroxylase                                         | C15H16N6O3       | No Development Reported |
| ABX-1431                              | HY-117632 | 1446817-84-0 | 507.39 | MAGL                                                               | C20H22F9N3O2     | Phase 2                 |
| Balipodect                            | HY-12472  | 1238697-26-1 | 428.42 | Phosphodiesterase (PDE)                                            | C23H17FN6O2      | Phase 2                 |
| SB-3CT                                | HY-12354  | 292605-14-2  | 306.4  | MMP                                                                | C15H14O3S2       | No Development Reported |
| Nepicastat (hydrochloride)            | HY-13289A | 170151-24-3  | 331.81 | Dopamine $\beta$ -hydroxylase                                      | C14H16ClF2N3S    | Phase 2                 |
| LEI-401                               | HY-131181 | 2393840-15-6 | 421.54 | Phospholipase                                                      | C24H31N5O2       | No Development Reported |

|                                         |            |              |         |                                                |                 |                         |
|-----------------------------------------|------------|--------------|---------|------------------------------------------------|-----------------|-------------------------|
| DSR-141562                              | HY-136569  | 2007975-22-4 | 414.42  | Phosphodiesterase (PDE)                        | C19H25F3N4O3    | No Development Reported |
| AT-007                                  | HY-129586  | 2170729-29-8 | 425.4   | Aldose Reductase                               | C17H10F3N3O3S2  | Phase 3                 |
| GSK805                                  | HY-12776   | 1426802-50-7 | 532.36  | ROR                                            | C23H18Cl2F3NO4S | No Development Reported |
| Apovincaminic acid (hydrochloride salt) | HY-133813A | 72296-47-0   | 358.86  | Drug Metabolite                                | C20H23ClN2O2    | No Development Reported |
| Miquelianin                             | HY-13930   | 22688-79-5   | 478.36  | Endogenous Metabolite                          | C21H18O13       | No Development Reported |
| MDL-28170                               | HY-18236   | 88191-84-8   | 382.45  | Proteasome                                     | C22H26N2O4      | No Development Reported |
| Mardepodect                             | HY-50098   | 898562-94-2  | 392.45  | Phosphodiesterase (PDE)                        | C25H20N4O       | Phase 2                 |
| Mardepodect (hydrochloride)             | HY-50098A  | 2070014-78-5 | 428.91  | Phosphodiesterase (PDE)                        | C25H21ClN4O     | Phase 2                 |
| NCT-501                                 | HY-18768   | 1802088-50-1 | 416.52  | Aldehyde Dehydrogenase (ALDH)                  | C21H32N6O3      | No Development Reported |
| Vitamin B12                             | HY-B0315   | 68-19-9      | 1355.37 | Endogenous Metabolite                          | C63H88CoN14O14P | Launched                |
| Vardenafil (hydrochloride)              | HY-B0442A  | 224785-91-5  | 525.06  | Endogenous Metabolite; Phosphodiesterase (PDE) | C23H33ClN6O4S   | Launched                |
| Chlorzoxazone                           | HY-B1462   | 95-25-0      | 169.57  | Cytochrome P450                                | C7H4ClNO2       | Launched                |
| Stiripentol                             | HY-103392  | 49763-96-4   | 234.29  | Cytochrome P450                                | C14H18O3        | Launched                |
| Dehydroascorbic acid                    | HY-110281  | 490-83-5     | 174.11  | Endogenous Metabolite                          | C6H6O6          | No Development Reported |
| L-Aspartic acid                         | HY-N0666   | 56-84-8      | 133.1   | Endogenous Metabolite                          | C4H7NO4         | No Development Reported |
| Firibastat                              | HY-109058  | 648927-86-0  | 368.51  | Aminopeptidase                                 | C8H20N2O6S4     | Phase 3                 |
| sn-Glycero-3-phosphocholine             | HY-17552   | 28319-77-9   | 257.22  | AChE; Endogenous Metabolite                    | C8H20NO6P       | Launched                |
| JNJ-1661010                             | HY-N7062   | 681136-29-8  | 365.45  | FAAH                                           | C19H19N5OS      | No Development Reported |
| Cyclo(his-pro) (TFA)                    | HY-101402A | 936749-56-3  | 348.28  | Endogenous Metabolite; NF-κB                   | C13H15F3N4O4    | No Development Reported |
| Progesterone                            | HY-N0437   | 57-83-0      | 314.46  | Endogenous Metabolite; Progesterone Receptor   | C21H30O2        | Launched                |
| Rutin (trihydrate)                      | HY-W013075 | 250249-75-3  | 664.56  | Endogenous Metabolite; Others                  | C27H36O19       | Phase 3                 |
| Choline (chloride)                      | HY-B1337   | 67-48-1      | 139.62  | Endogenous Metabolite; Others                  | C5H14ClNO       | Launched                |

**Table S3. Computational analysis demonstrates a key role of tumor glycolysis in regulation of myeloid/leukocyte migration, immune response, and cytokine/chemokine in TCGA GBM patients.**

| Top ten enriched pathways in metabolism-high patients | Gene Ontology Biological Process              | Hallmark pathways         | KEGG Pathways                               |
|-------------------------------------------------------|-----------------------------------------------|---------------------------|---------------------------------------------|
| #1                                                    | EXTERNAL_ENCAPSULATING_STRUCTURE_ORGANIZATION | EMT                       | COMPLEMENT_AND_COAGULATION_CASCADES         |
| #2                                                    | LEUKOCYTE_MIGRATION                           | TNFA_SIGNALING_VIA_NFKB   | CYTOKINE_CYTOKINE_RECEPTOR_INTERACTION      |
| #3                                                    | LEUKOCYTE_CHEMOTAXIS                          | HYPOXIA                   | HEMATOPOIETIC_CELL_LINEAGE                  |
| #4                                                    | CELL_CHEMOTAXIS                               | INFLAMMATORY_RESPONSE     | ECM_RECEPTOR_INTERACTION                    |
| #5                                                    | ACUTE_INFLAMMATORY_RESPONSE                   | COAGULATION               | FOCAL_ADHESION                              |
| #6                                                    | HUMORAL_IMMUNE_RESPONSE                       | IL6_JAK_STAT3_SIGNALING   | LYSOSOME                                    |
| #7                                                    | ADAPTIVE_IMMUNE_RESPONSE                      | ALLOGRAFT_REJECTION       | NOD_LIKE_RECEPTOR_SIGNALING_PATHWAY         |
| #8                                                    | PLATELET_DEGRANULATION                        | COMPLEMENT                | AMINO_SUGAR_AND_NUCLEOTIDE_SUGAR_METABOLISM |
| #9                                                    | POSITIVE_REGULATION_OF_CELL_ADHESION          | APOPTOSIS                 | LEUKOCYTE_TRANSENDOTHELIAL_MIGRATION        |
| #10                                                   | REGULATION_OF_LEUKOCYTE_MIGRATION             | INTERFERON_GAMMA_RESPONSE | LEISHMANIA_INFECTION                        |

**Table S4. Computational analysis demonstrates a key role of LDHA in regulation of myeloid/leukocyte migration, immune response, and cytokine/chemokine in TCGA GBM patients.**

| Top ten enriched pathways in metabolism-high patients | Gene Ontology Biological Process | Hallmark pathways       | KEGG Pathways                          |
|-------------------------------------------------------|----------------------------------|-------------------------|----------------------------------------|
| #1                                                    | EXTERNAL_ENCAPSULATING_STRUCTURE | EMT                     | FOCAL_ADHESION                         |
| #2                                                    | COLLAGEN_FIBRIL_ORGANIZATION     | INFLAMMATORY_RESPONSE   | ECM_RECEPTOR_INTERACTION               |
| #3                                                    | HUMORAL_IMMUNE_RESPONSE          | TNFA_SIGNALING_VIA_NFKB | CYTOKINE_CYTOKINE_RECEPTOR_INTERACTION |
| #4                                                    | NEUTROPHIL_MIGRATION             | HYPOXIA                 | LYSOSOME                               |
| #5                                                    | MYELOID_LEUKOCYTE_IMMUNITY       | COAGULATION             | LEUKOCYTE_TRANSENDOTHELIAL_MIGRATION   |
| #6                                                    | MYELOID_LEUKOCYTE_ACTIVATION     | APOPTOSIS               | NOD_LIKE_RECEPTOR_SIGNALING_PATHWAY    |
| #7                                                    | INFLAMMATORY_RESPONSE            | UV_RESPONSE_DN          | COMPLEMENT_AND_COAGULATION_CASCADES    |

|     |                            |                         |                                             |
|-----|----------------------------|-------------------------|---------------------------------------------|
| #8  | GRANULOCYTE_MIGRATION      | IL6_JAK_STAT3_SIGNALING | LEISHMANIA_INFECTION                        |
| #9  | COLLAGEN_METABOLIC_PROCESS | GLYCOLYSIS              | HEMATOPOIETIC_CELL_LINEAGE                  |
| #10 | MONOCYTE_CHEMOTAXIS        | COMPLEMENT              | AMINO_SUGAR_AND_NUCLEOTIDE_SUGAR_METABOLISM |

**Table S5. Computational analysis demonstrates a key role of CCL2 for myeloid/leukocyte migration in TCGA GBM patients.**

| Top ten enriched pathways | Gene Ontology Biological Process           | Gene Ontology Molecular Function | KEGG Enrichment Analysis                                      |
|---------------------------|--------------------------------------------|----------------------------------|---------------------------------------------------------------|
| #1                        | Response to bacterium                      | Cytokine activity                | Cytokine-cytokine receptor interaction                        |
| #2                        | Leukocyte migration                        | Cytokine receptor binding        | NOD-like receptor signaling pathway                           |
| #3                        | Regulation of response to wounding         | Glycosaminoglycan binding        | TNF signaling pathway                                         |
| #4                        | Response to molecule of bacterial origin   | Peptidase regulator activity     | Viral protein interaction with cytokine and cytokine receptor |
| #5                        | Response to lipopolysaccharide             | Endopeptidase regulator activity | Osteoclast differentiation                                    |
| #6                        | Cell chemotaxis                            | Endopeptidase inhibitor activity | Rheumatoid arthritis                                          |
| #7                        | Leukocyte chemotaxis                       | Heparin binding                  | NF-kappa B signaling pathway                                  |
| #8                        | Myeloid leukocyte migration                | Growth factor binding            | Complement and coagulation cascades                           |
| #9                        | Granulocyte migration                      | Chemokine receptor binding       | IL-17 signaling pathway                                       |
| #10                       | Positive regulation of leukocyte migration | Chemokine activity               | Malaria                                                       |

**Table S6. Computational analysis demonstrates a key role of CCL7 for myeloid/leukocyte migration in TCGA GBM patients.**

| Top ten enriched pathways | Gene Ontology Biological Process   | Gene Ontology Molecular Function | KEGG Enrichment Analysis                                      |
|---------------------------|------------------------------------|----------------------------------|---------------------------------------------------------------|
| #1                        | Leukocyte migration                | Cytokine activity                | Cytokine-cytokine receptor interaction                        |
| #2                        | Response to bacterium              | Cytokine receptor binding        | Lipid and atherosclerosis                                     |
| #3                        | Regulation of response to wounding | Carbohydrate binding             | TNF signaling pathway                                         |
| #4                        | Cell chemotaxis                    | Glycosaminoglycan binding        | Tuberculosis                                                  |
| #5                        | Leukocyte chemotaxis               | Peptidase regulator activity     | Viral protein interaction with cytokine and cytokine receptor |
| #6                        | Myeloid leukocyte migration        | Cell adhesion molecule binding   | Rheumatoid arthritis                                          |

|     |                                            |                                |                                     |
|-----|--------------------------------------------|--------------------------------|-------------------------------------|
| #7  | Regulation of leukocyte migration          | Heparin binding                | IL-17 signaling pathway             |
| #8  | Positive regulation of leukocyte migration | Chemokine receptor binding     | NF-kappa B signaling pathway        |
| #9  | Granulocyte migration                      | Chemokine activity             | Complement and coagulation cascades |
| #10 | Granulocyte chemotaxis                     | CCR chemokine receptor binding | Legionellosis                       |

**Table S7. A list of primers used for RT-qPCR and ChIP-PCR analysis.**

| Gene name                    | Forward                   | Reverse                   |
|------------------------------|---------------------------|---------------------------|
| <b>RT-qPCR primers</b>       |                           |                           |
| <i>Actb</i>                  | GGCTGTATTCCCCTCCATCG      | CCAGTTGGTAACAATGCCATGT    |
| <i>Ccl2</i>                  | TTAAAAACCTGGATCGGAACCAA   | GCATTAGCTTCAGATTTACGGGT   |
| <i>CCL2</i>                  | CAGCCAGATGCAATCAATGCC     | TGGAATCCTGAACCCACTTCT     |
| <i>Ccl7</i>                  | CCACATGCTGCTATGTCAAGA     | ACACCGACTACTGGTGATCCT     |
| <i>S100a8</i>                | AAATCACCATGCCCTCTACAAG    | CCCACCTTTTATCACCATCGCAA   |
| <i>Il1rap</i>                | GGAGGAGCCCATTAACTTCCG     | CCGTGTCATTGAGGAGGGT       |
| <i>Plau</i>                  | GCGCCTTGTTGGTGAACAAAC     | TTGTAGGACACGCATACACCT     |
| <i>Hoxa9</i>                 | GGCCTTATGGCATTAAACCTGA    | ACAAAGTGTGAGTGTCAAGCG     |
| <i>Yap1</i>                  | TGAGATCCCTGATGATGTACCAC   | TGTTGTTGTCTGATCGTTGTGAT   |
| <i>Eed</i>                   | GGGGAGATACGGTTATTGCAG     | TCATAGGTCCATGCACAAGTGTA   |
| <i>Ezh2</i>                  | AGTGACTTGGATTTTCCAGCAC    | AATTCTGTTGTAAGGGCGACC     |
| <i>Arg1</i>                  | TTGGGTGGATGCTCACACTG      | GTACACGATGTCTTTGGCAGA     |
| <b>YAP1 ChIP-PCR primers</b> |                           |                           |
| <i>Ccl2</i>                  | CCACTTTCATCACTTATCCAGG    | TGCTCTGAGGCAGCCTTTTA      |
| <i>Ccl7</i>                  | TAAGTTCCTATTTCCACCTTTGTCT | AGCTCAGTACTAGAGTTTTTGTCTA |
| <b>YAP1 ChIP-PCR primers</b> |                           |                           |
| <i>Ccl2</i>                  | GCAGAGGCAGGCAAATTTCTGA    | TGTATAGTCCTGGCTGTCCTGG    |
| <i>Ccl7</i>                  | GCCACATCCGGCCCAACTA       | TGAGGGCCATCCCAAAGCAT      |

**Table S8. Patient information.**

| NSTB ID    | Age at time of collection | Sex    | New diagnosis vs. recurrent diagnosis | Overall survival - days | Ki-67 Histology | ELISA      | IHC staining | Exosome isolation |
|------------|---------------------------|--------|---------------------------------------|-------------------------|-----------------|------------|--------------|-------------------|
| <b>GBM</b> |                           |        |                                       |                         |                 | <b>GBM</b> | <b>GBM</b>   | <b>GBM</b>        |
| NU00323    | 45-54                     | Male   | Recurrent                             | 1086                    | 5%              | NU00323    | NU00538      | NU00538           |
| NU00538    | 45-54                     | Male   | New                                   | 422                     | 30%             | NU00538    | NU01713      | NU01713           |
| NU00655    | 50-59                     | Female | New                                   | 959                     | 10%             | NU00655    | NU01793      | NU01793           |
| NU00677    | 70-69                     | Female | New                                   | 311                     | 20%             | NU00677    | NU01798      | NU01798           |
| NU00761    | 45-54                     | Male   | New                                   | 378                     | 20%             | NU00761    | NU01808      | NU01808           |
| NU00764    | 75-84                     | Female | New                                   | 283                     | 15%             | NU00764    | NU01853      | NU00323           |
| NU00792    | 75-84                     | Male   | New                                   | 54                      | 20%             | NU00792    | NU01861      | NU00677           |
| NU00908    | 35-44                     | Male   | New                                   | 1094                    | 20%             | NU00908    | NU01903      | NU00792           |
| NU00915    | 75-84                     | Female | New                                   | 31                      | 50%             | NU00915    | NU01991      | NU00908           |
| NU01063    | 65-74                     | Female | Recurrent                             | 339                     | 20%             | NU01063    | NU01994      | NU01107           |
| NU01107    | 60-69                     | Female | New                                   | 401                     | 15%             | NU01107    | NU02013      |                   |
| NU01185    | 70-69                     | Male   | Recurrent                             |                         | 1-2%            | NU01185    | NU02064      |                   |
| NU01197    | 60-69                     | Female | Recurrent                             | 874                     | 0.1             | NU01197    | NU02120      |                   |
| NU01201    | 80-79                     | Female | New                                   | 434                     | Not reported    | NU01201    | NU02156      |                   |
| NU01226    | 80-79                     | Male   | New                                   | 189                     | 20%             | NU01226    | NU02203      |                   |
| NU01232    | 75-84                     | Male   | New                                   | 231                     | 35%             | NU01232    | NU02411      |                   |

|                   |       |        |           |      |              |                   |         |  |
|-------------------|-------|--------|-----------|------|--------------|-------------------|---------|--|
| NU01247           | 50-59 | Male   | New       | 691  | 40%          | NU01247           | NU02446 |  |
| NU01276           | 45-54 | Male   | Recurrent | 673  | Not reported | NU01276           | NU02541 |  |
| NU01293           | 65-74 | Female | Recurrent | 1050 | 30-40%       | NU01293           | NU02569 |  |
| NU01327           | 55-64 | Male   | Recurrent | 805  | Not reported | NU01327           | NU02647 |  |
| NU01485           | <25   | Female | Recurrent |      | 80-90%       | NU01485           | NU01063 |  |
| NU01620           | 70-69 | Male   | New       | 381  | 20%          | NU01620           | NU01197 |  |
| NU01702           | 50-59 | Male   | Recurrent | 386  | 2%           | NU01702           | NU01327 |  |
| NU01713           | 50-59 | Male   | New       | 1025 | 30%          | NU01713           | NU01485 |  |
| NU01743           | 65-74 | Male   | New       | 102  | 30%          | NU01743           | NU02209 |  |
| NU01761           | 65-74 | Male   | Recurrent |      | 30%          | NU01761           | NU02254 |  |
| NU01793           | 65-74 | Female | New       |      | 40%          | NU01793           | NU02326 |  |
| NU01798           | 65-74 | Female | New       |      | 30%          | NU01798           | NU02359 |  |
| NU01808           | 35-44 | Female | New       | 470  | 40-50%       | NU01808           | NU02576 |  |
| NU01853           | 65-74 | Female | New       | 370  | Not reported | NU01853           | NU02718 |  |
| NU01861           | 55-64 | Male   | New       | 297  | 60%          | NU01861           |         |  |
| NU01903           | 55-64 | Male   | New       | 434  | 60-70%       | NU01903           |         |  |
| NU01967           | 55-64 | Male   | New       | 138  | >80%         | NU01967           |         |  |
| NU01991           | 75-84 | Male   | New       |      | 8-10%        | NU01991           |         |  |
| NU01994           | 65-74 | Male   | New       | 389  | 20%          | NU01994           |         |  |
| NU02013           | 55-64 | Female | New       |      | 0.5          | NU02013           |         |  |
| NU02064           | 65-74 | Female | New       |      | 0.2          | NU02064           |         |  |
| NU02120           | 55-64 | Male   | New       |      | 0.4          | NU02120           |         |  |
| NU02156           | 75-84 | Female | New       | 233  | 0.25         | NU02156           |         |  |
| NU02203           | 35-44 | Female | New       | 470  | 40-50%       | NU02203           |         |  |
| NU02209           | 55-64 | Female | Recurrent | 675  | 0.7          | NU02209           |         |  |
| NU02254           | 55-64 | Female | Recurrent | 746  | 0.5          | NU02254           |         |  |
| NU02299           | 55-64 | Male   | New       |      | 30%          | NU02299           |         |  |
| NU02326           | 60-69 | Male   | Recurrent |      | 0.6          | NU02326           |         |  |
| NU02337           | 45-54 | Male   | New       |      | 50%          | NU02337           |         |  |
| NU02359           | 75-84 | Female | Recurrent | 149  | 0.4          | NU02359           |         |  |
| NU02411           | 55-64 | Female | New       | 389  | 0.4          | NU02411           |         |  |
| NU02446           | 55-64 | Female | New       |      | 0.4          | NU02446           |         |  |
| NU02541           | 65-74 | Female | New       |      | 0.15         | NU02541           |         |  |
| NU02569           | 70-79 | Male   | New       |      | 0.25         | NU02569           |         |  |
| NU02576           | 50-59 | Female | Recurrent |      | 30%          | NU02576           |         |  |
| NU02618           | 75-84 | Male   | New       |      | 25%          | NU02618           |         |  |
| NU02647           | 65-74 | Male   | New       |      | 0.3          | NU02647           |         |  |
| NU02718           | 55-64 | Male   | Recurrent |      | 30-40%       | NU02718           |         |  |
| <b>Meningioma</b> |       |        |           |      |              | <b>Meningioma</b> |         |  |
| NU01136           | 55-64 | Male   | New       |      |              | NU01136           |         |  |
| NU01254           | 55-64 | Female | New       |      |              | NU01254           |         |  |
| NU01305           | 55-64 | Female | New       |      |              | NU01305           |         |  |
| NU01496           | 65-74 | Male   | New       |      |              | NU01496           |         |  |
| NU01500           | 65-74 | Male   | New       |      |              | NU01500           |         |  |
| NU01657           | 50-59 | Female | New       |      |              | NU01657           |         |  |

|         |       |        |     |  |  |         |
|---------|-------|--------|-----|--|--|---------|
| NU01811 | 60-69 | Male   | New |  |  | NU01811 |
| NU02071 | 65-74 | Female | New |  |  | NU02071 |
| NU02143 | 60-69 | Female | New |  |  | NU02143 |
| NU02202 | 60-69 | Female | New |  |  | NU02202 |
| NU02331 | 75-84 | Male   | New |  |  | NU02331 |
| NU02520 | 60-69 | Female | New |  |  | NU02520 |
| NU02527 | 50-59 | Male   | New |  |  | NU02527 |
| NU02530 | 50-59 | Male   | New |  |  | NU02530 |
| NU02707 | <25   | Female | New |  |  | NU02707 |
